# Supplementary material for: Xishaeleganins A–D, Sesquiterpenoid Hydroquinones from Xisha Marine Sponge Dactylospongia elegans
Source: MDPI journal article supplement (doi:10.3390/md20020118), 2022-02-01
Supplement: s1 [file s1]

# **Xishaeleganins A–D, Sesquiterpenoid Hydroquinones from Xisha Marine Sponge *Dactylospongia elegans***

Bao Chen <sup>1,2</sup>, Qingmin Zhao <sup>1,3</sup>, Yu-Cheng Gu <sup>4</sup>, Lefu Lan <sup>1,3,\*</sup>, Chang-Yun Wang <sup>2,\*</sup> and Yue-Wei Guo <sup>1,5,\*</sup>

<sup>1</sup> State Key Laboratory of Drug Research, Shanghai Institute of Materia Medica, Chinese Academy of Sciences, 555 Zu Chong Zhi Road, Zhangjiang Hi-Tech Park, Shanghai, 201203, China; ywguo@simm.ac.cn; llan@simm.ac.cn

<sup>2</sup> Key Laboratory of Marine Drugs, The Ministry of Education of China, School of Medicine and Pharmacy, Ocean University of China, Qingdao, 266003, China; [changyun@ouc.edu.cn](mailto:changyun@ouc.edu.cn); chenbao2333@163.com

<sup>3</sup> University of Chinese Academy of Sciences, No.19A Yuquan Road, Beijing 100049, P. R. China; s19-zhaoqingmin@simm.ac.cn

<sup>4</sup> Bohai rim Advanced Research Institute for Drug Discovery, 198 Binhai East Road, High-tech Zone, Yantai, 264000, China; ywguo@simm.ac.cn

<sup>5</sup> Syngenta, Jealott's Hill International Research Centre, Bracknell, Berkshire RG42 6EY, United Kingdom; [yucheng.gu@syngenta.com](mailto:yucheng.gu@syngenta.com)

\* Correspondence: llan@simm.ac.cn (L.F.L.); changyun@ouc.edu.cn (C.-Y.W.); ywguo@simm.ac.cn (Y.-W.G.)

## Contents

|                                                                                       |    |
|---------------------------------------------------------------------------------------|----|
| Figure S1 1D, 2D NMR, MS and IR spectra of Compound 6 .....                           | 7  |
| Figure S2 1D, 2D NMR, MS and IR spectra of Compound 7 .....                           | 12 |
| Figure S3 1D, 2D NMR, MS and IR spectra of Compound 8 .....                           | 17 |
| Figure S4 1D, 2D NMR, MS and IR spectra of Compound 9 .....                           | 22 |
| Figure S5 $^1\text{H}$ and $^{13}\text{C}$ NMR spectra of Compound 12 and 14–23 ..... | 33 |

## Qualitative Analysis Report

|                        |                                        |                               |                             |
|------------------------|----------------------------------------|-------------------------------|-----------------------------|
| <b>Data Filename</b>   | ESI202103582.d                         | <b>Sample Name</b>            | A8-A8-3JCA31                |
| <b>Sample ID</b>       |                                        | <b>Position</b>               | P1-C5                       |
| <b>Instrument Name</b> | Agilent G6520 Q-TOF                    | <b>Acq Method</b>             | 20160322_MS_ESIH_POS_1min.m |
| <b>Acquired Time</b>   | 7/23/2021 16:24:06                     | <b>IRM Calibration Status</b> | Success                     |
| <b>DA Method</b>       | small molecular data analysis method.m | <b>Comment</b>                | ESI2H by zhuzhenyun         |

### User Spectra

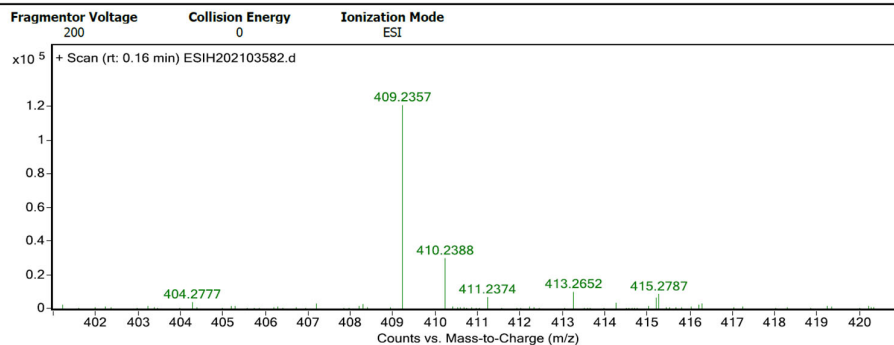

### Formula Calculator Results

| m/z      | Calc m/z | Diff (mDa) | Diff (ppm) | Ion Formula                                      | Ion                 |
|----------|----------|------------|------------|--------------------------------------------------|---------------------|
| 409.2357 | 409.2349 | -0.76      | -1.86      | C <sub>24</sub> H <sub>34</sub> NaO <sub>4</sub> | (M+Na) <sup>+</sup> |

--- End Of Report ---

### (a) HRESIMS spectrum of compound 6

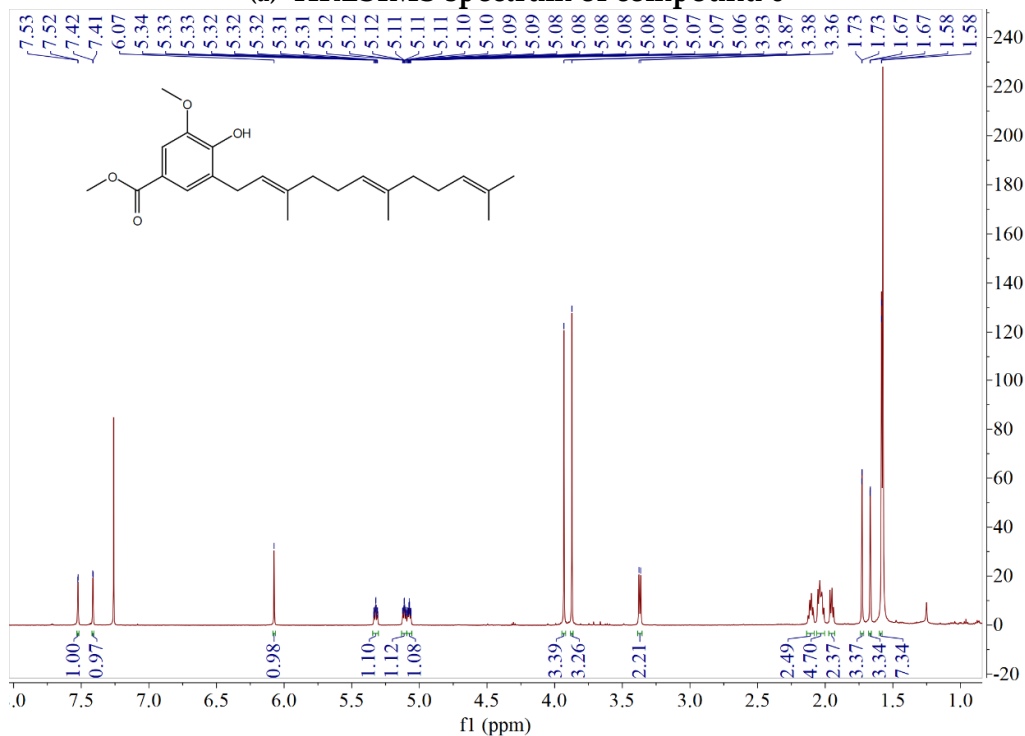

### (b) <sup>1</sup>H NMR spectrum of compound 6 in CDCl<sub>3</sub>

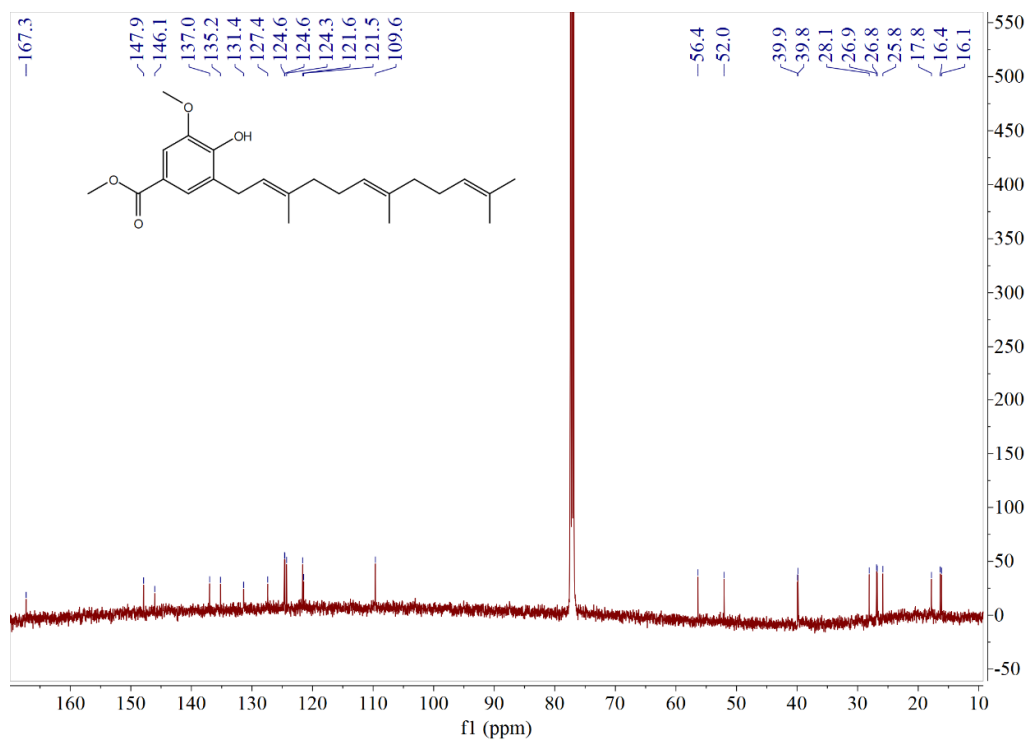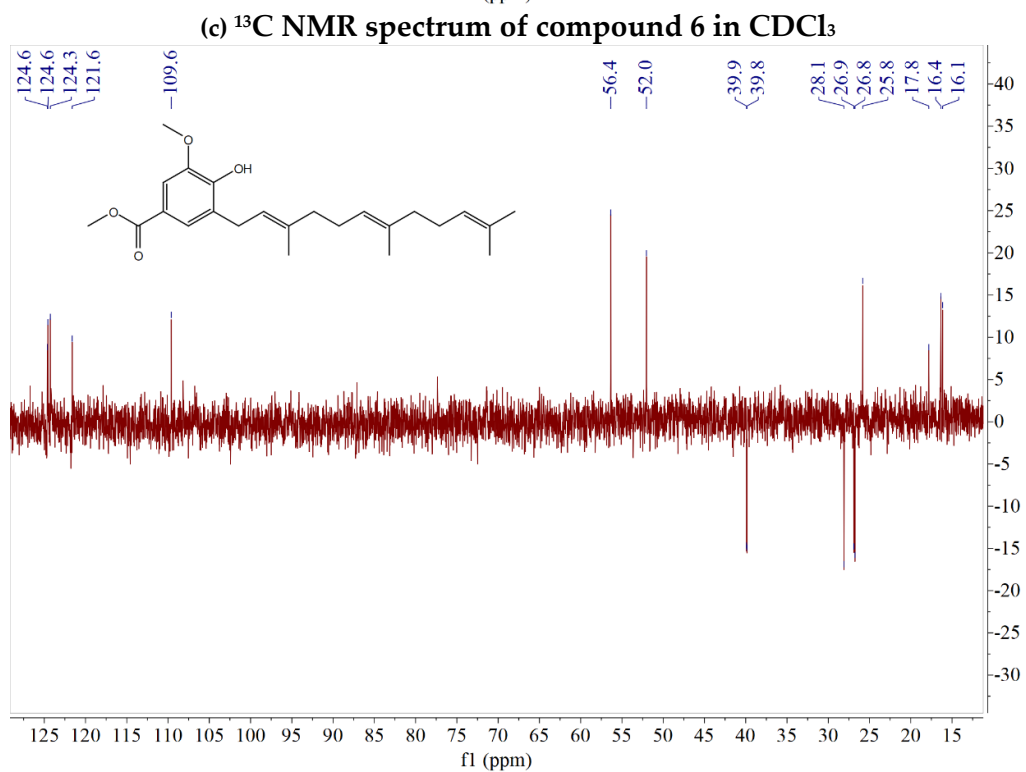

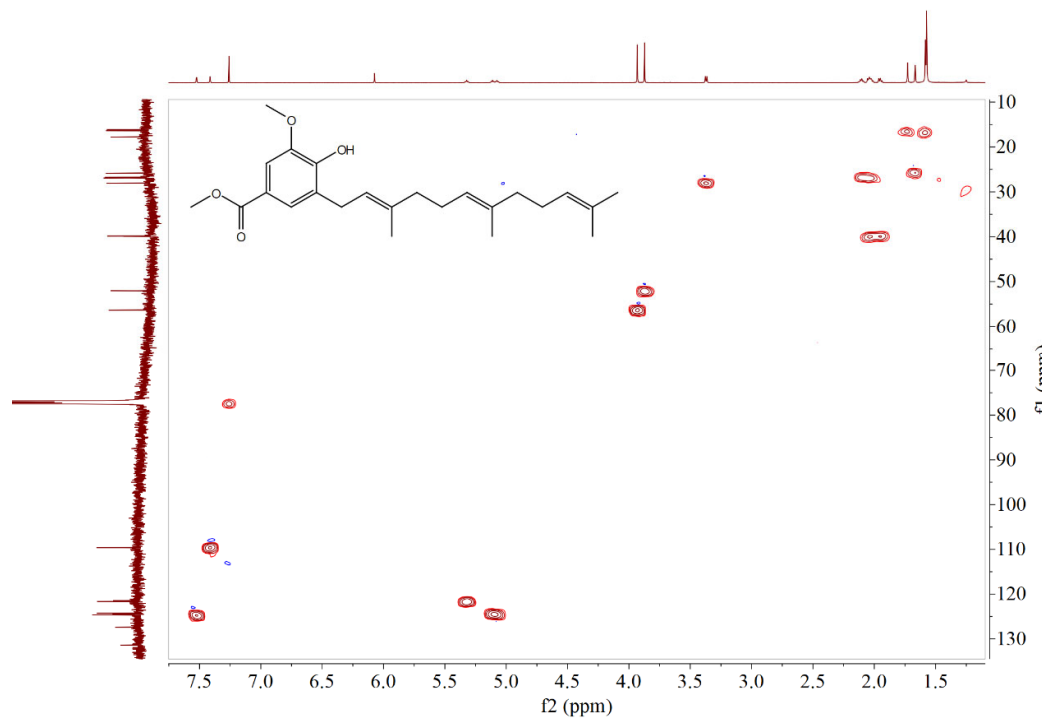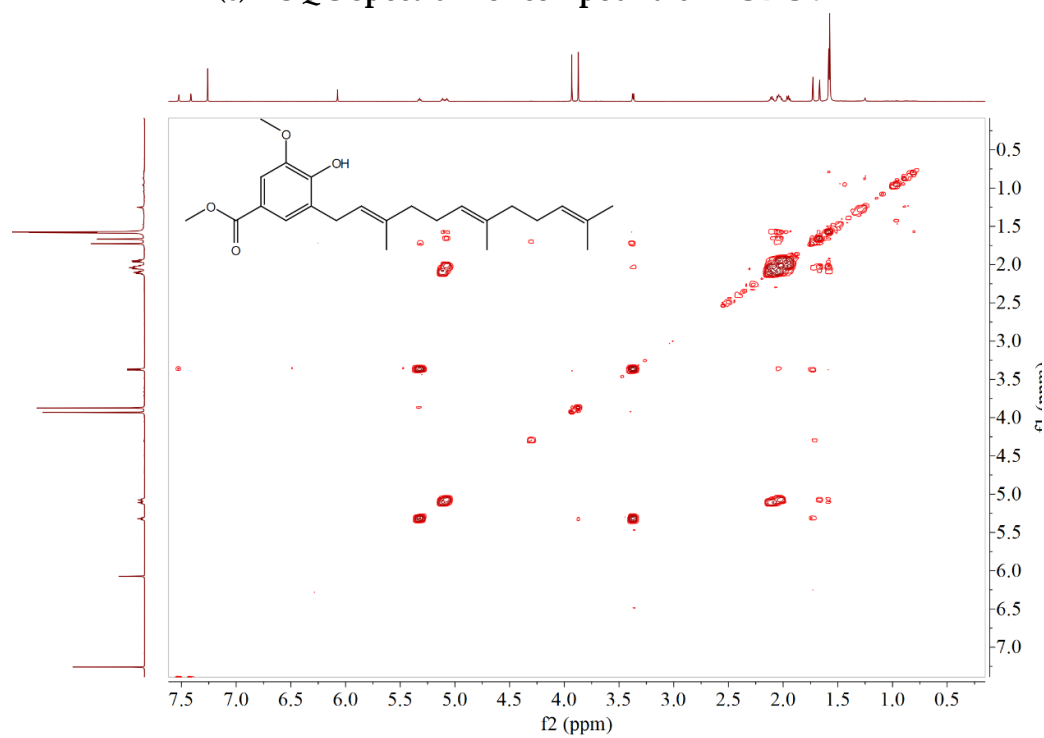

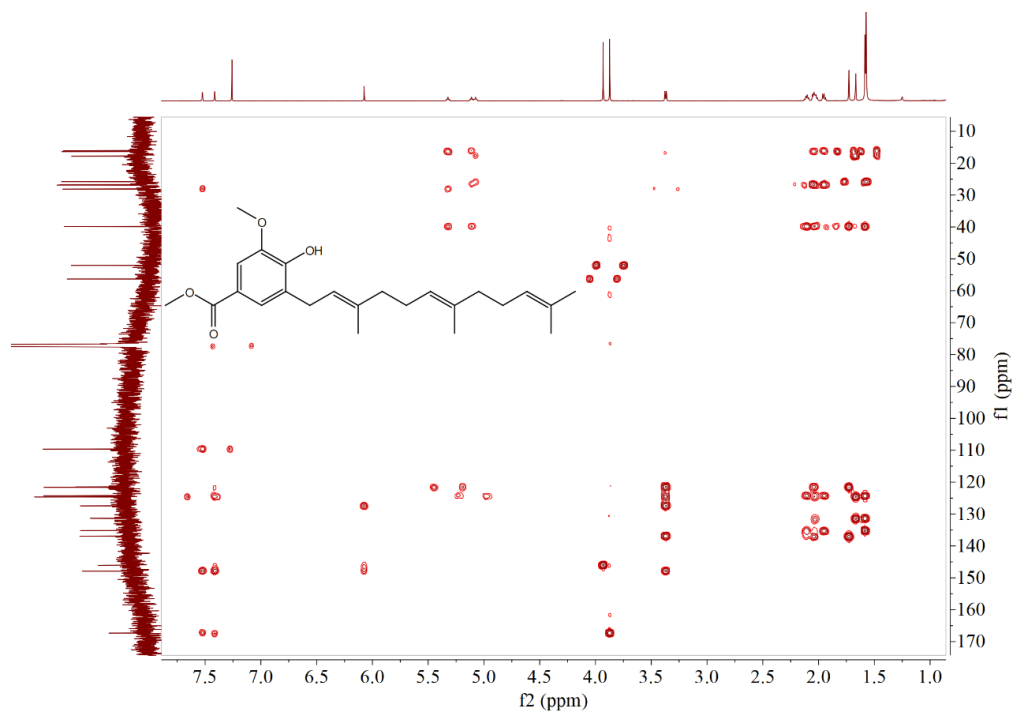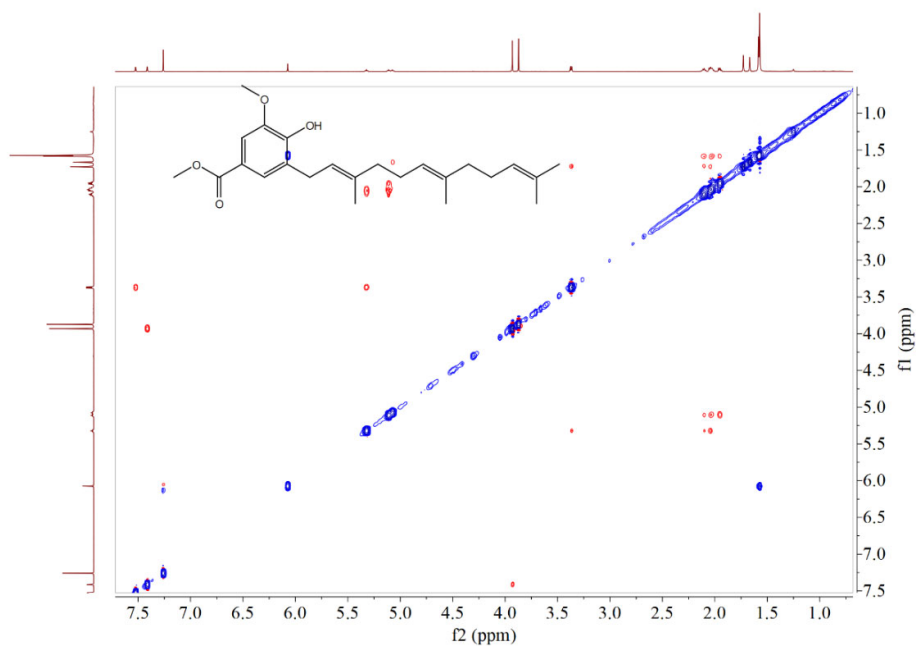

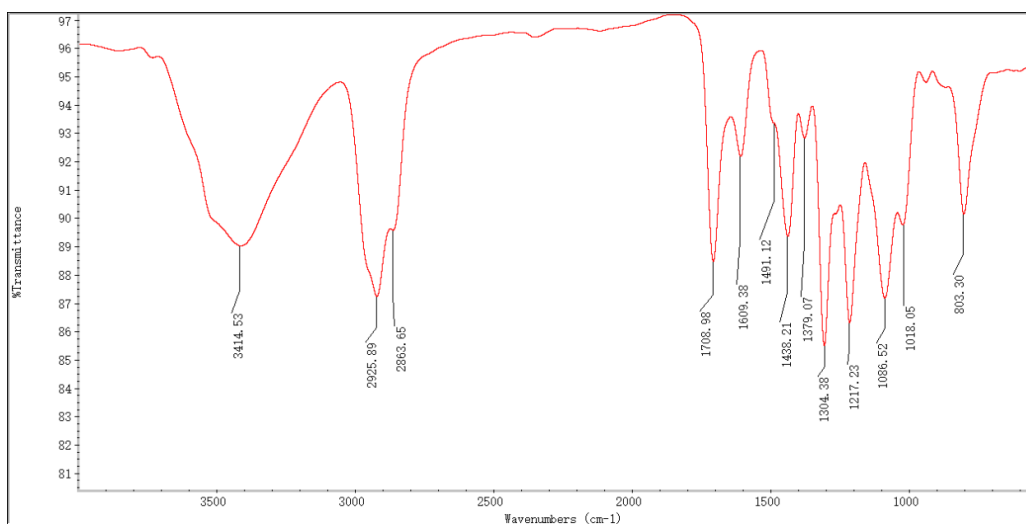

(i) FT-IR spectrum of compound 6

Figure S1. 1D, 2D NMR, MS and IR spectra of Compound 6.

## Qualitative Analysis Report

|                        |                                        |                               |                             |
|------------------------|----------------------------------------|-------------------------------|-----------------------------|
| <b>Data Filename</b>   | ESI202103218.d                         | <b>Sample Name</b>            | A8-A8-3JHB1                 |
| <b>Sample ID</b>       |                                        | <b>Position</b>               | P1-E4                       |
| <b>Instrument Name</b> | Agilent G6520 Q-TOF                    | <b>Acq Method</b>             | 20160322_MS_ESIH_POS_1min.m |
| <b>Acquired Time</b>   | 6/30/2021 16:09:54                     | <b>IRM Calibration Status</b> | Success                     |
| <b>DA Method</b>       | small molecular data analysis method.m | <b>Comment</b>                | ESIH by zhuzhenyun          |

### User Spectra

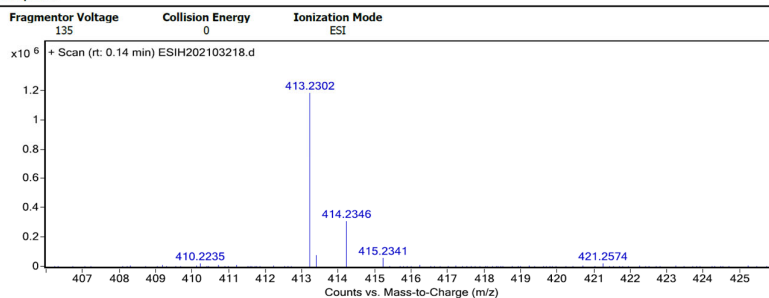

### Formula Calculator Results

| m/z      | Calc m/z | Diff (mDa) | Diff (ppm) | Ion Formula   | Ion     |
|----------|----------|------------|------------|---------------|---------|
| 413.2302 | 413.2298 | -0.32      | -0.78      | C23 H34 Na O5 | (M+Na)+ |

--- End Of Report ---

## (a) HRESIMS spectrum of compound 7

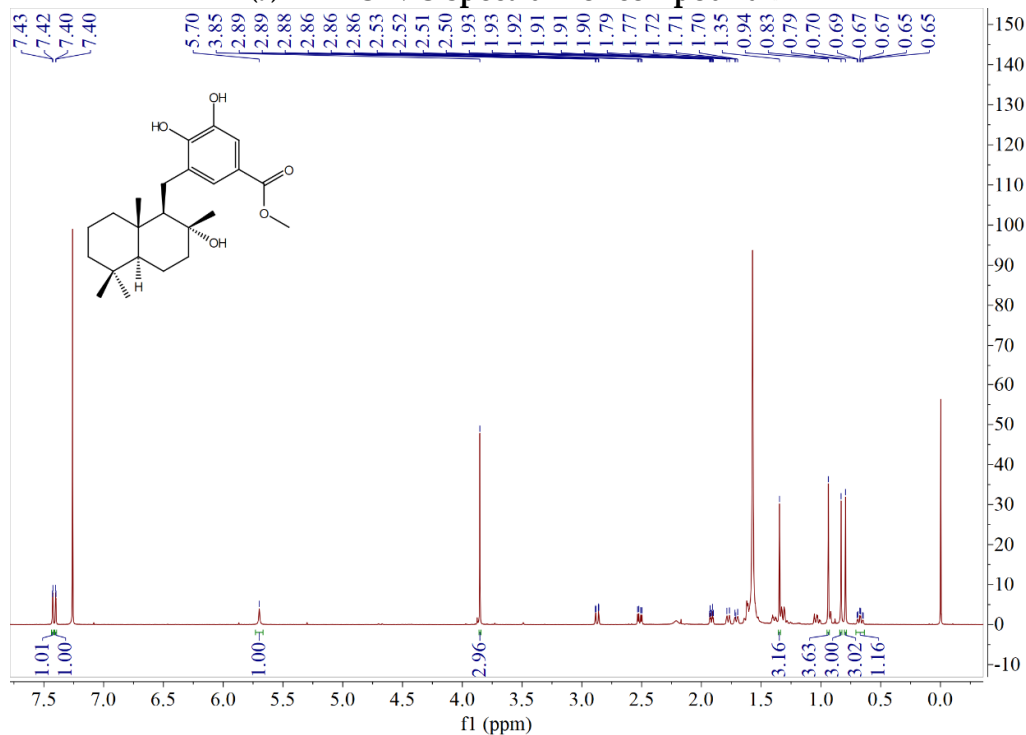

## (b) <sup>1</sup>H NMR spectrum of compound 7 in CDCl<sub>3</sub>



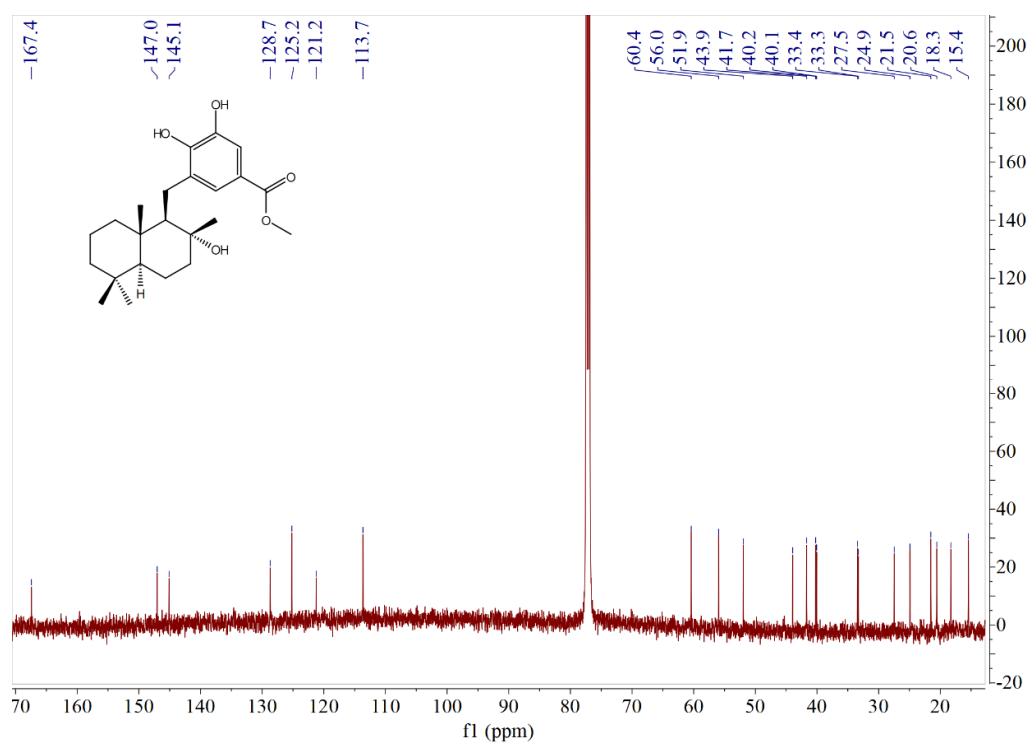

(c) <sup>13</sup>C NMR spectrum of compound 7 in CDCl<sub>3</sub>

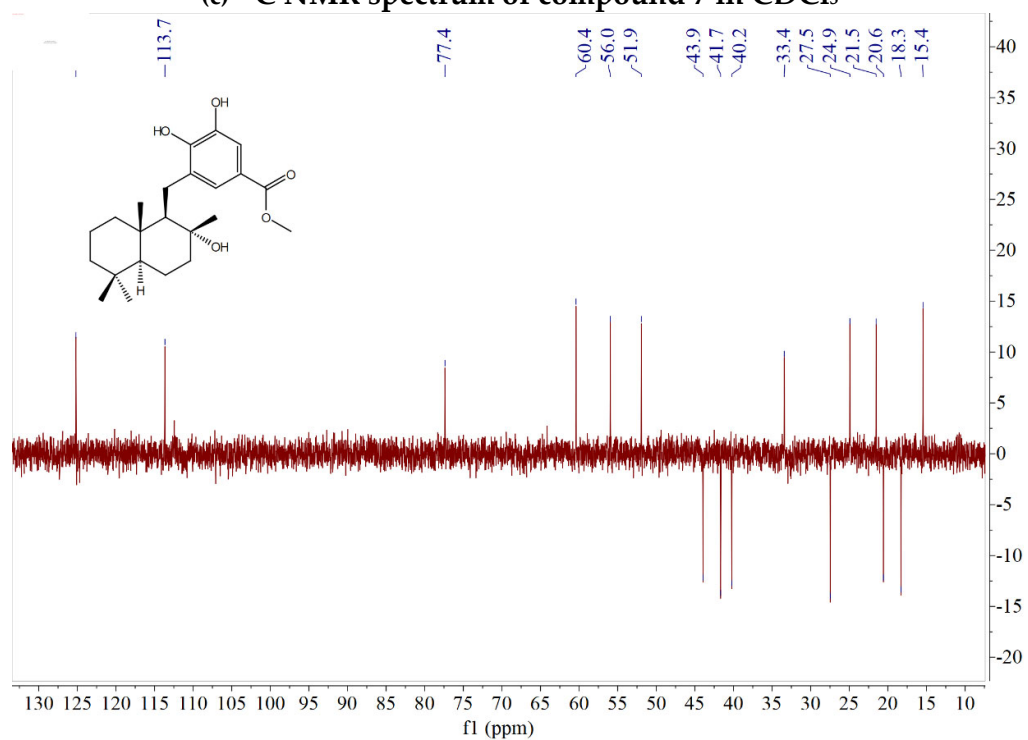

(d) DEPT spectrum of compound 7 in CDCl<sub>3</sub>

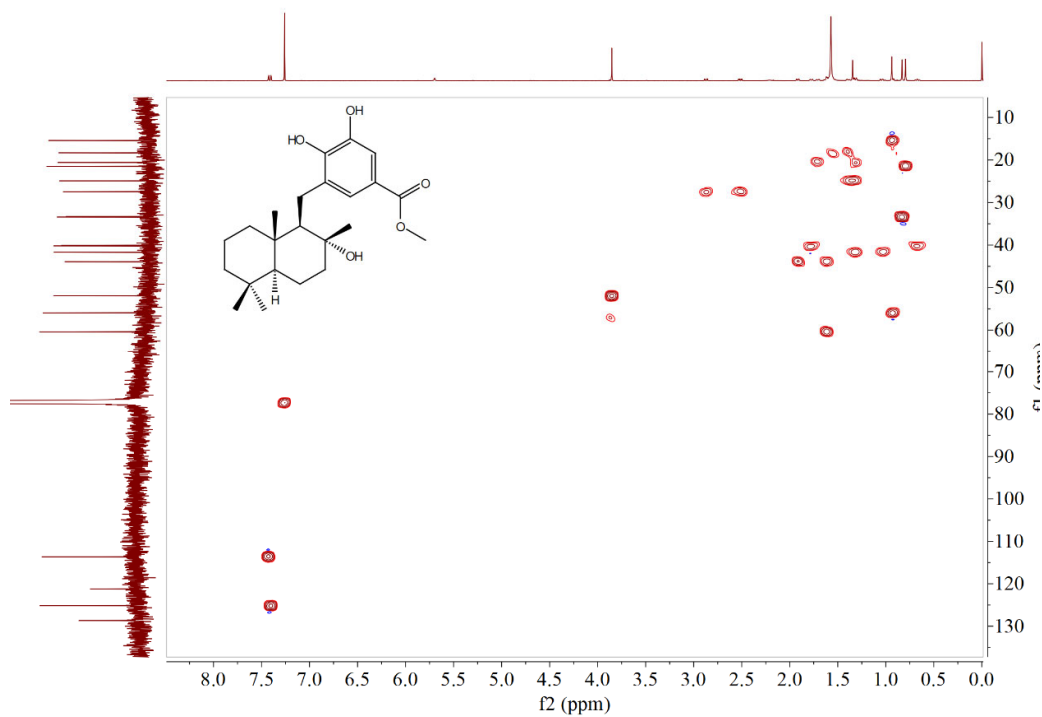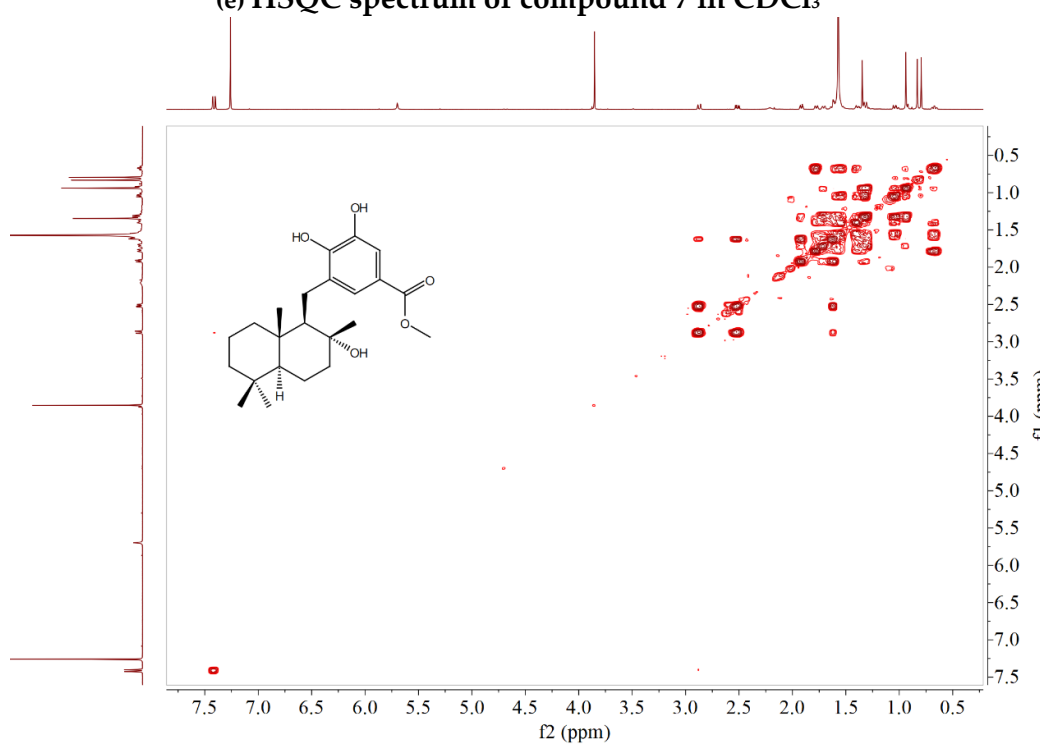

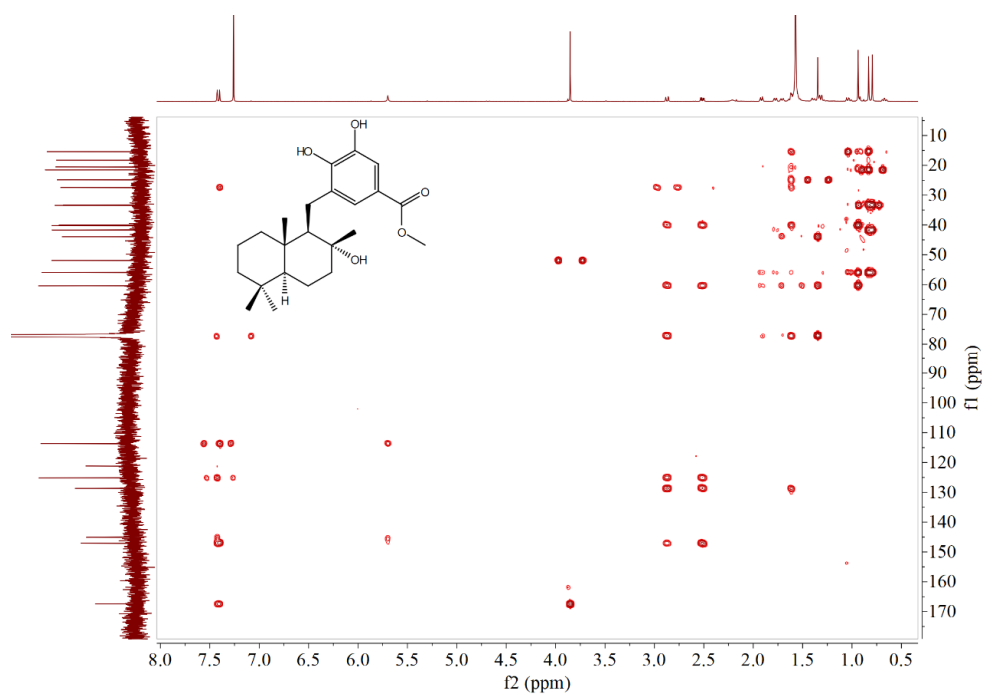

(g) HMBC spectrum of compound 7 in  $\text{CDCl}_3$

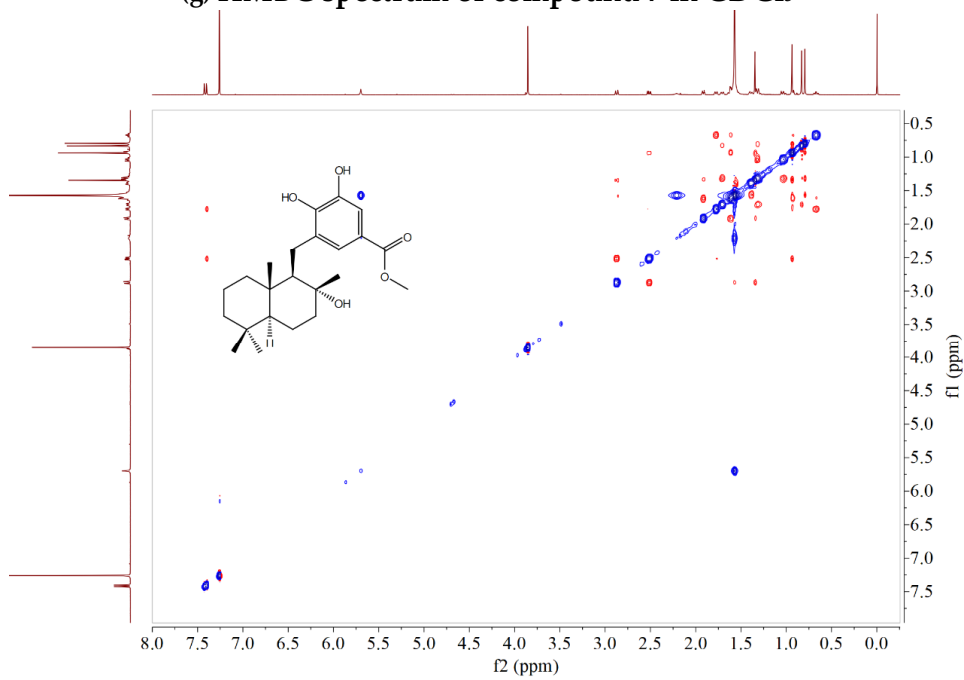

(h) NOESY spectrum of compound 7 in  $\text{CDCl}_3$

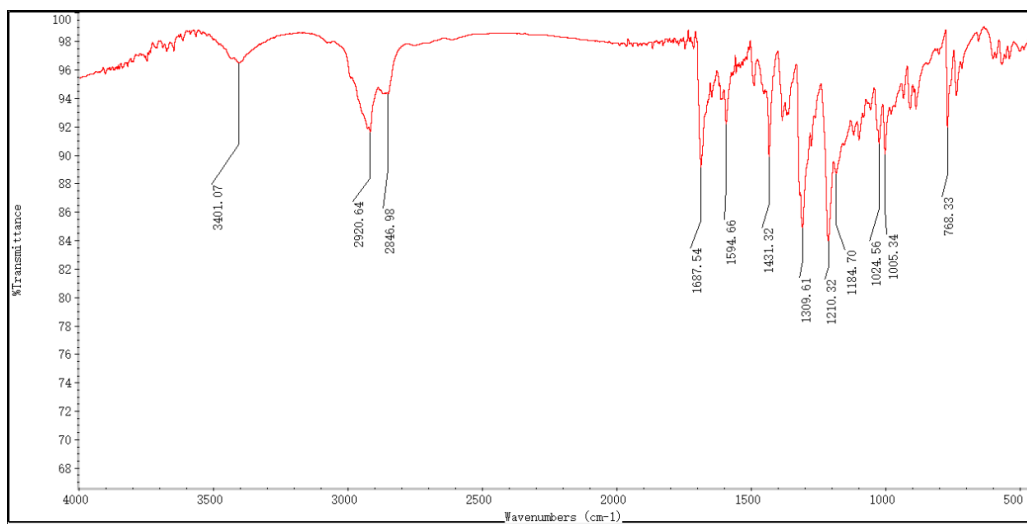

(i) FT-IR spectrum of compound 7

Figure S2 1D, 2D NMR, MS and IR spectra of Compound 7

### User Spectra

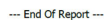

Printed at: 18:44 on: 7/14/2021

Chemical structure of compound 10 is shown in the top left. The  $^1\text{H}$  NMR spectrum (CDCl<sub>3</sub>) is displayed below, with chemical shifts (ppm) labeled above the peaks and integration values labeled below the baseline.

| Chemical Shift (ppm) | Integration |
|----------------------|-------------|
| 7.39                 | 1.00        |
| 5.24                 | 0.96        |
| 4.57                 | 2.09        |
| 3.91                 | 1.26        |
| 3.90                 | 2.95        |
| 3.89                 | 2.92        |
| 3.88                 |             |
| 3.87                 |             |
| 3.84                 |             |
| 3.81                 |             |
| 3.19                 | 1.27        |
| 3.17                 | 2.60        |
| 2.37                 | 1.30        |
| 2.35                 |             |
| 1.47                 |             |
| 1.45                 |             |
| 1.04                 | 3.55        |
| 1.03                 | 3.15        |
| 0.93                 |             |
| 0.61                 | 2.98        |

(b)  $^1\text{H}$  NMR spectrum of compound 8 in  $\text{CDCl}_3$

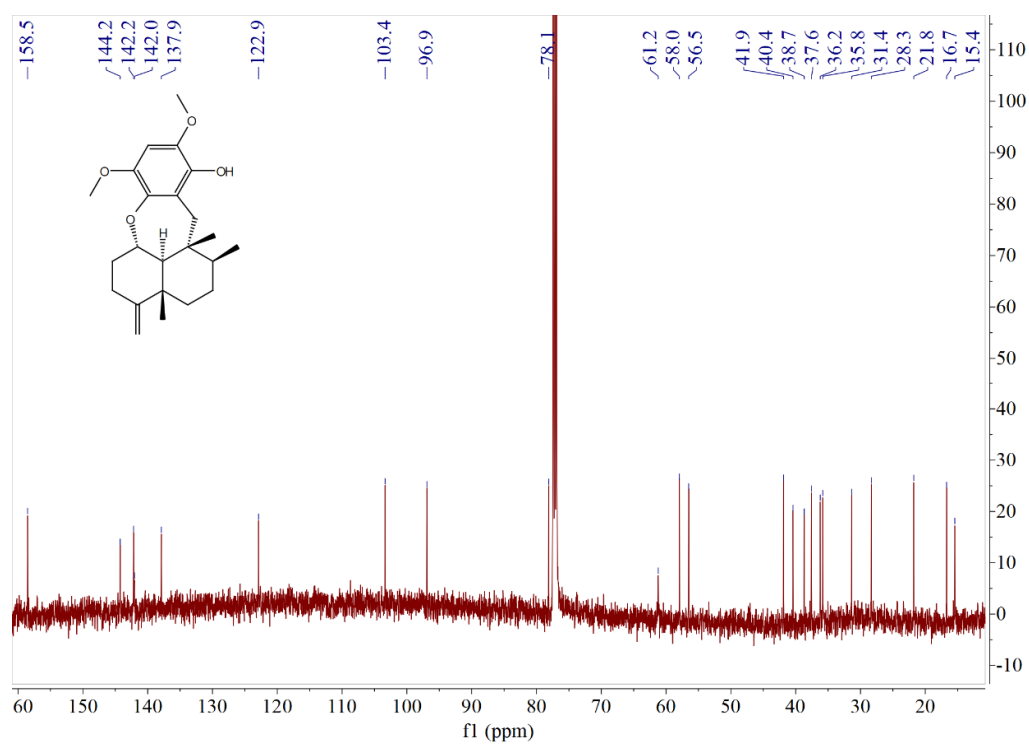

(c)  $^{13}\text{C}$  NMR spectrum of compound 8 in  $\text{CDCl}_3$

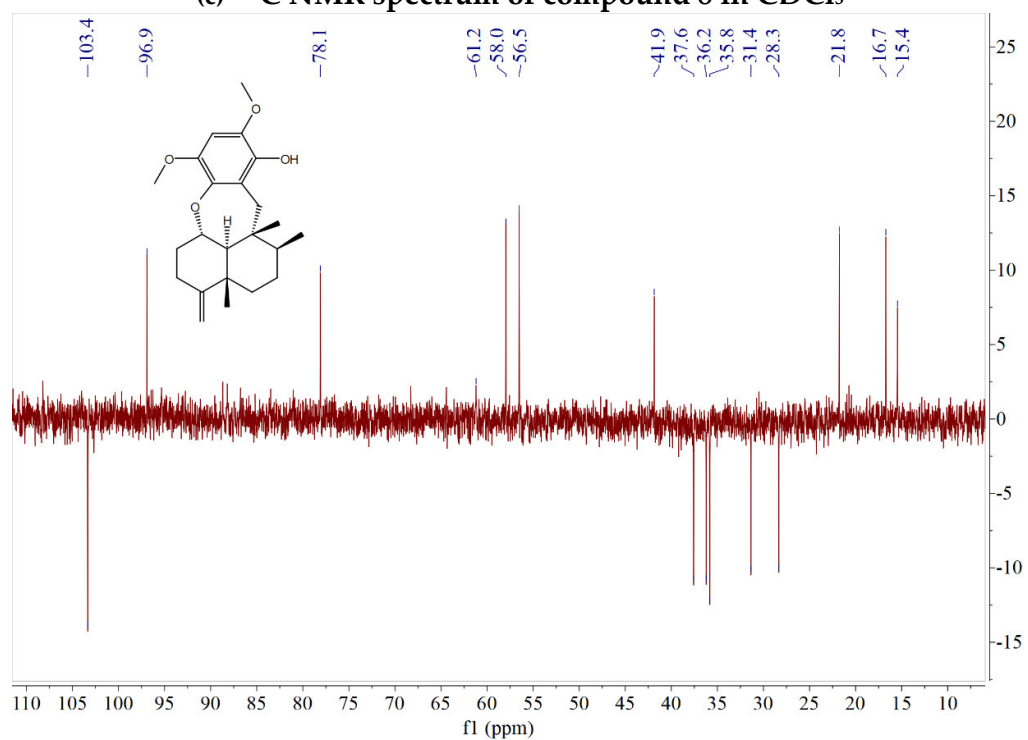

(d) DEPT spectrum of compound 8 in  $\text{CDCl}_3$

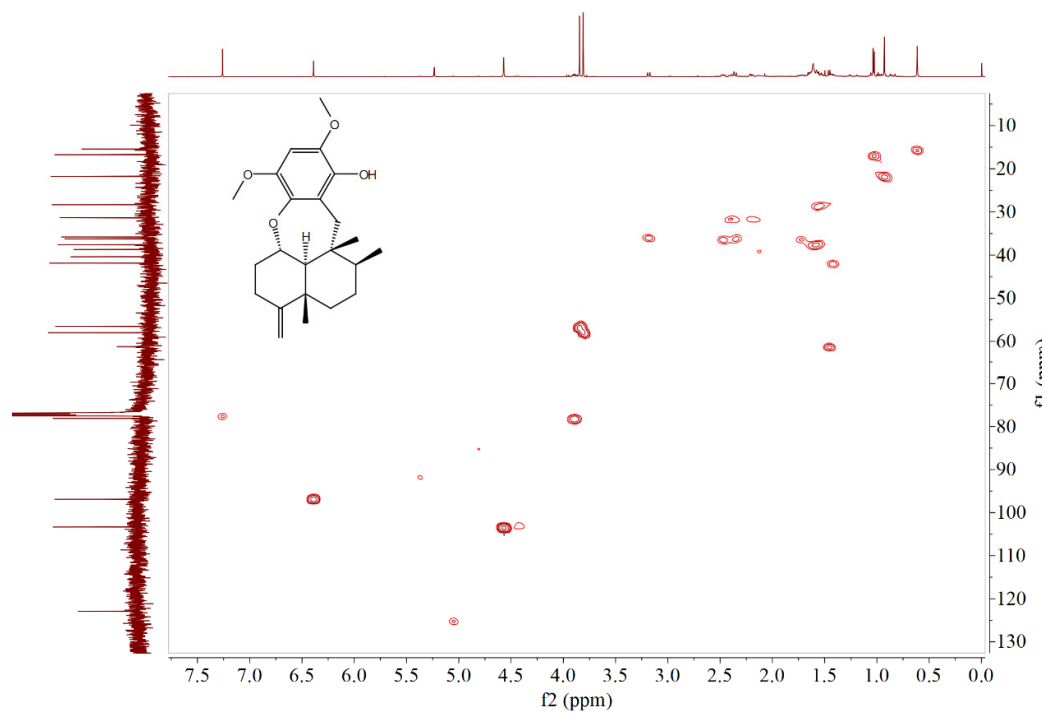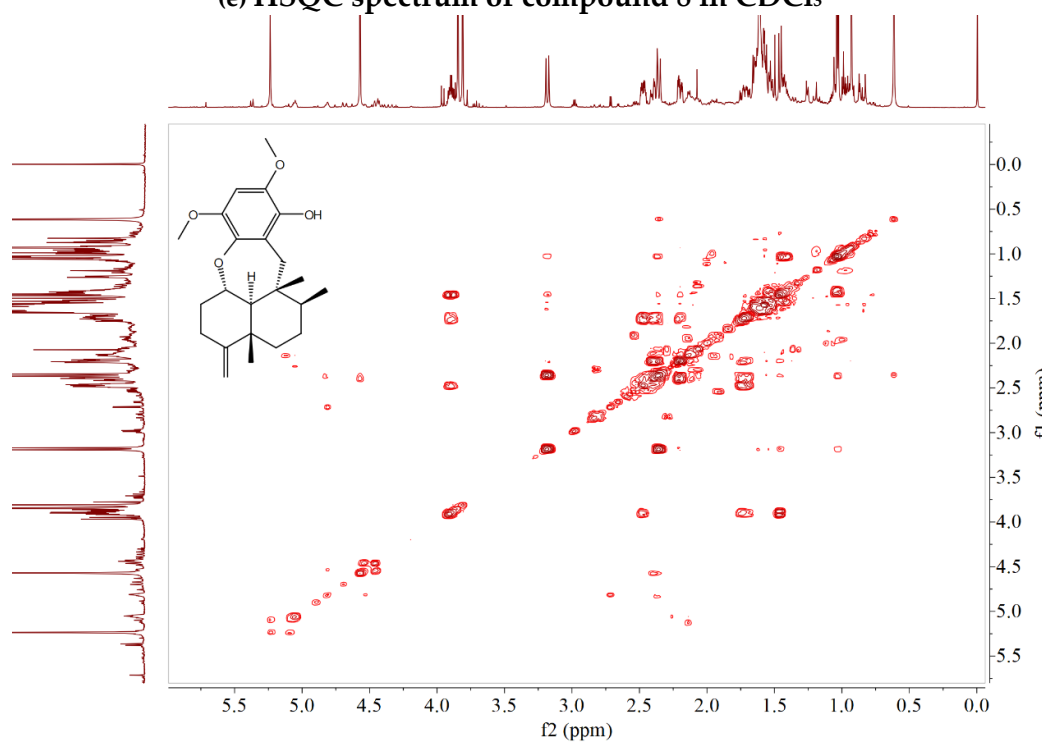

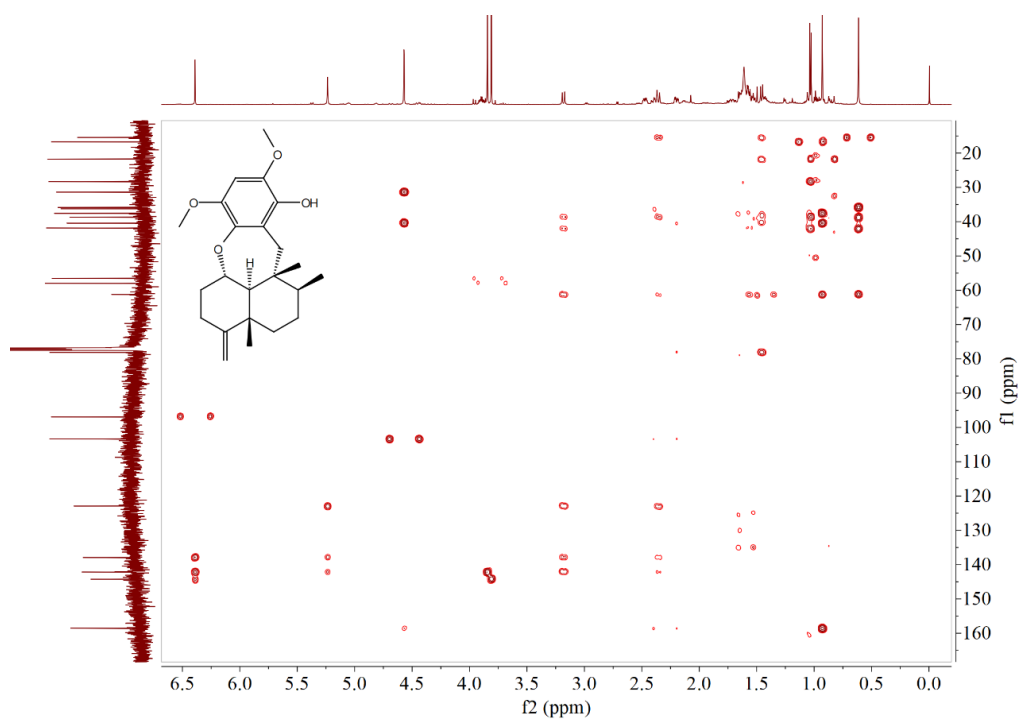

(g) HMBC spectrum of compound 8 in  $\text{CDCl}_3$

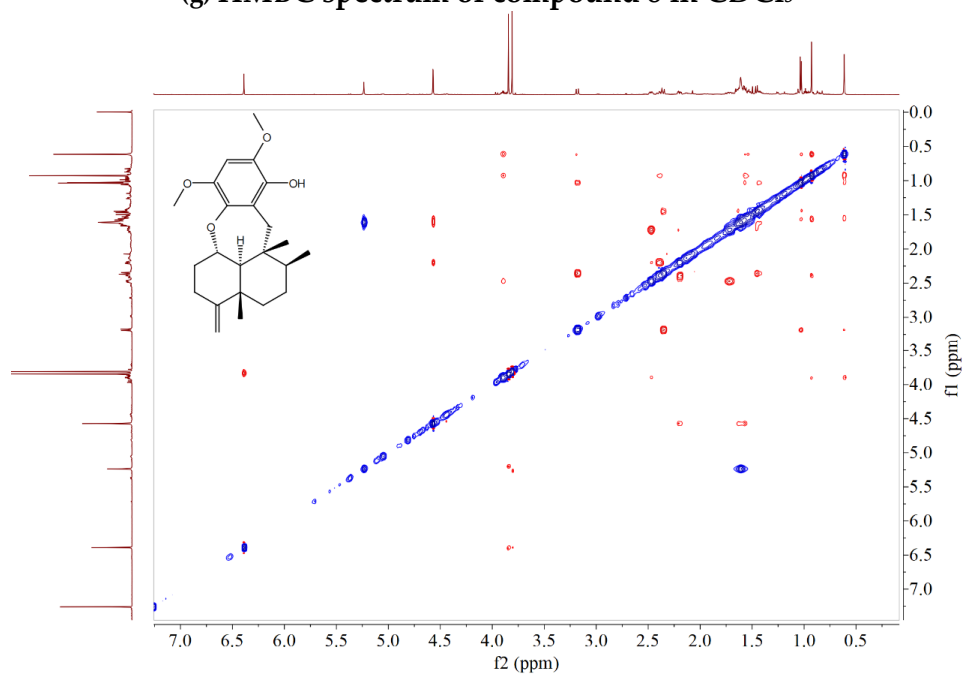

(h) NOESY spectrum of compound 8 in  $\text{CDCl}_3$



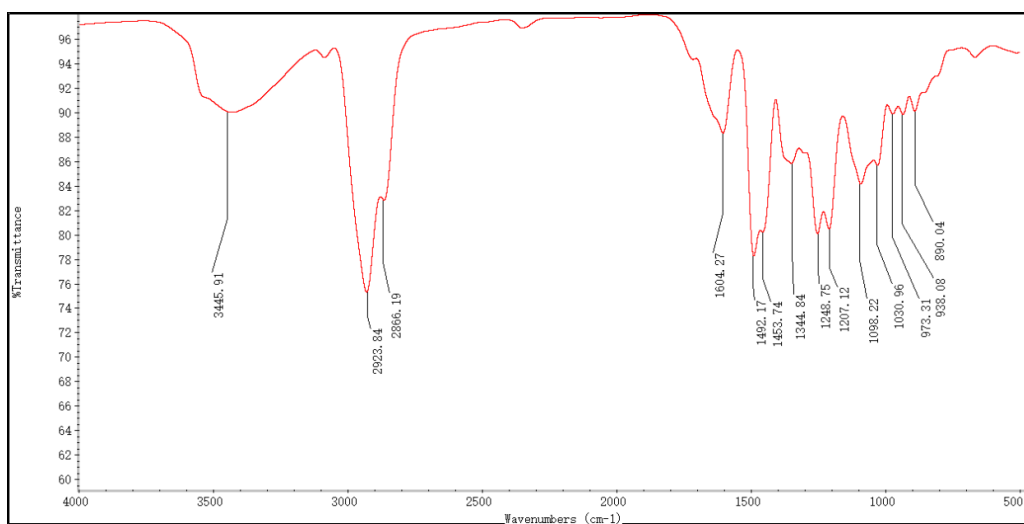

(i) FT-IR spectrum of compound 8

Figure S3 1D, 2D NMR, MS and IR spectra of Compound 8

EI202101307\_A8-A8-2JGC4 -c1#7 RT: 1.24

T: + c EI Full ms [ 49.50-800.50]

m/z= 48-803

| m/z      | Intensity | Relative | Theo. Mass | Delta (mmu) | RDB equiv. | Composition                                    |
|----------|-----------|----------|------------|-------------|------------|------------------------------------------------|
| 205.0858 | 396046.0  | 11.86    | 205.0859   | -0.15       | 6.5        | C <sub>12</sub> H <sub>13</sub> O <sub>3</sub> |
| 217.0858 | 228612.0  | 6.84     | 217.0859   | -0.16       | 7.5        | C <sub>13</sub> H <sub>13</sub> O <sub>3</sub> |
| 218.0939 | 311565.0  | 9.33     | 218.0937   | 0.11        | 7.0        | C <sub>13</sub> H <sub>14</sub> O <sub>3</sub> |
| 219.1013 | 236693.0  | 7.09     | 219.1016   | -0.30       | 6.5        | C <sub>13</sub> H <sub>15</sub> O <sub>3</sub> |
| 220.1097 | 1258839.0 | 37.69    | 220.1094   | 0.35        | 6.0        | C <sub>13</sub> H <sub>16</sub> O <sub>3</sub> |
| 231.1013 | 262170.0  | 7.85     | 231.1016   | -0.27       | 7.5        | C <sub>14</sub> H <sub>15</sub> O <sub>3</sub> |
| 232.1090 | 509735.0  | 15.26    | 232.1094   | -0.40       | 7.0        | C <sub>14</sub> H <sub>16</sub> O <sub>3</sub> |
| 233.1167 | 465511.0  | 13.94    | 233.1172   | -0.56       | 6.5        | C <sub>14</sub> H <sub>17</sub> O <sub>3</sub> |
| 356.2346 | 1504553.0 | 45.04    | 356.2346   | 0.00        | 8.0        | C <sub>23</sub> H <sub>32</sub> O <sub>3</sub> |

(a) HREIMS spectrum of compound 9

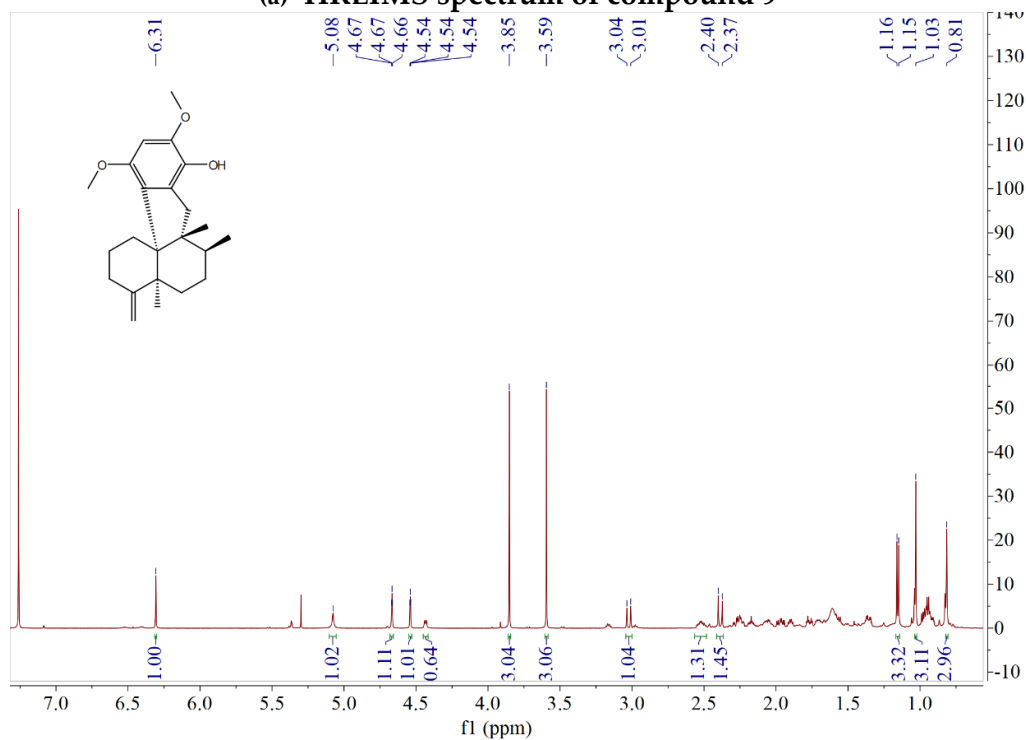(b) <sup>1</sup>H NMR spectrum of compound 9 in CDCl<sub>3</sub>

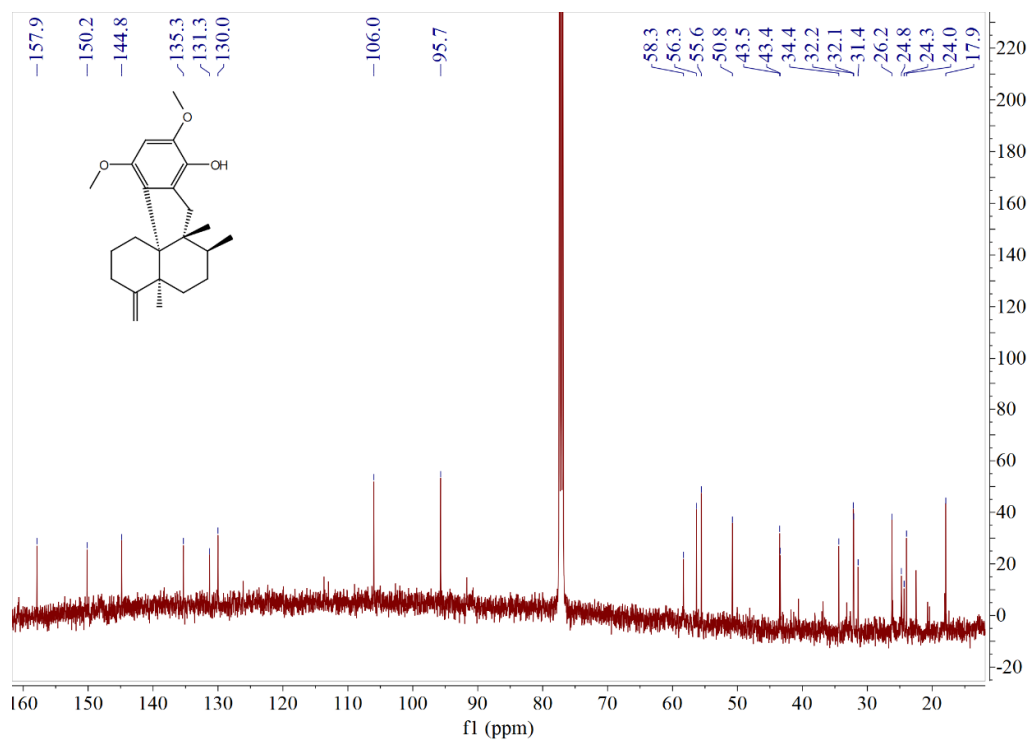

(c) <sup>13</sup>C NMR spectrum of compound 9 in CDCl<sub>3</sub>

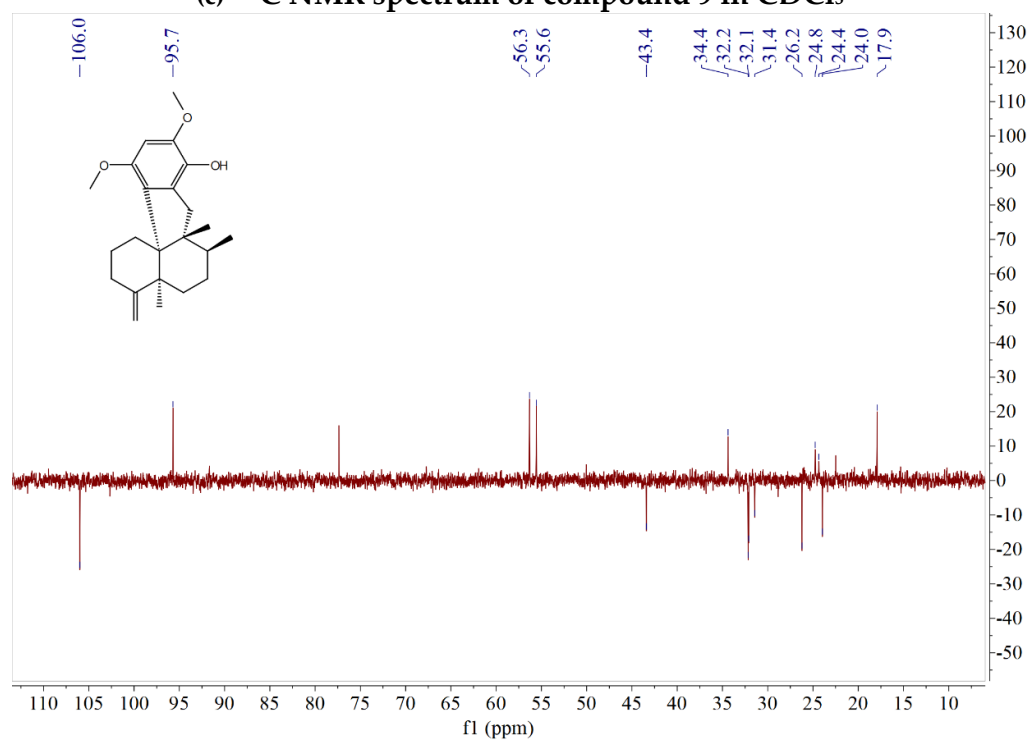

(d) DEPT spectrum of compound 9 in CDCl<sub>3</sub>

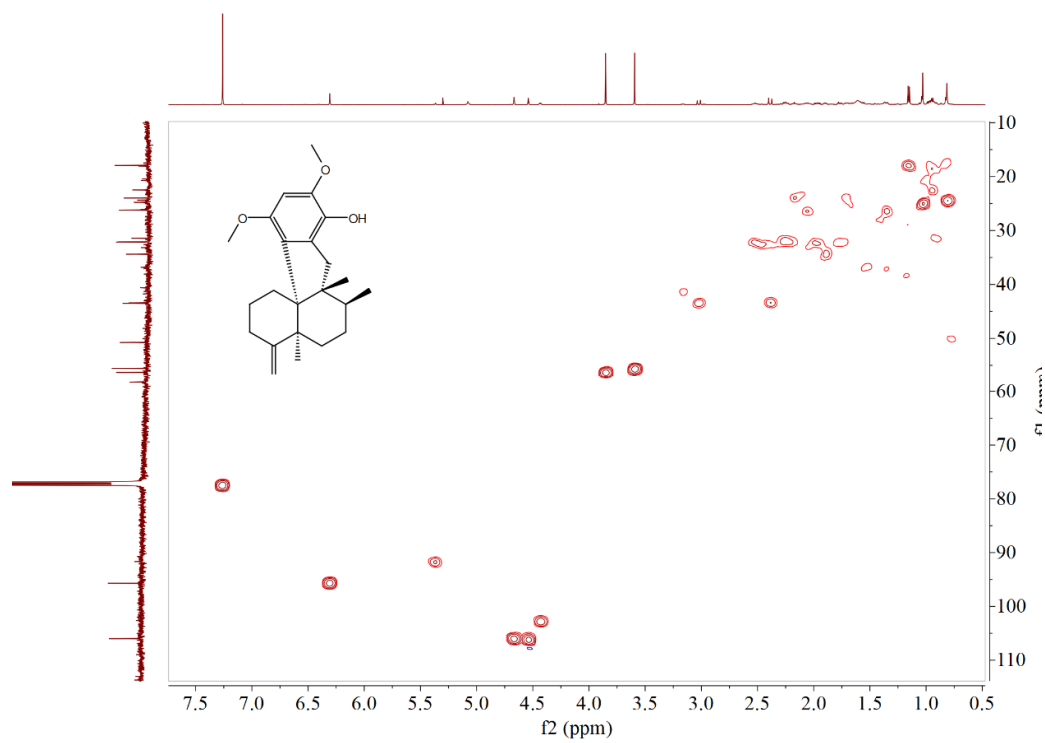

(e) HSQC spectrum of compound 9 in CDCl<sub>3</sub>

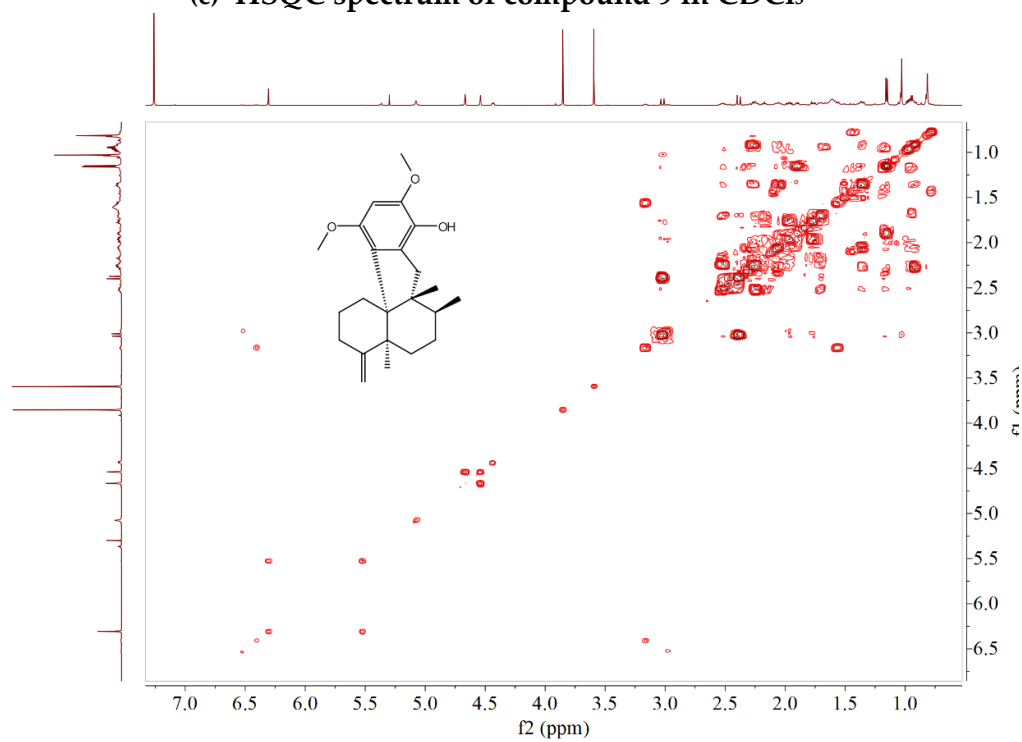

(f) <sup>1</sup>H-<sup>1</sup>H COSY spectrum of compound 9 in CDCl<sub>3</sub>

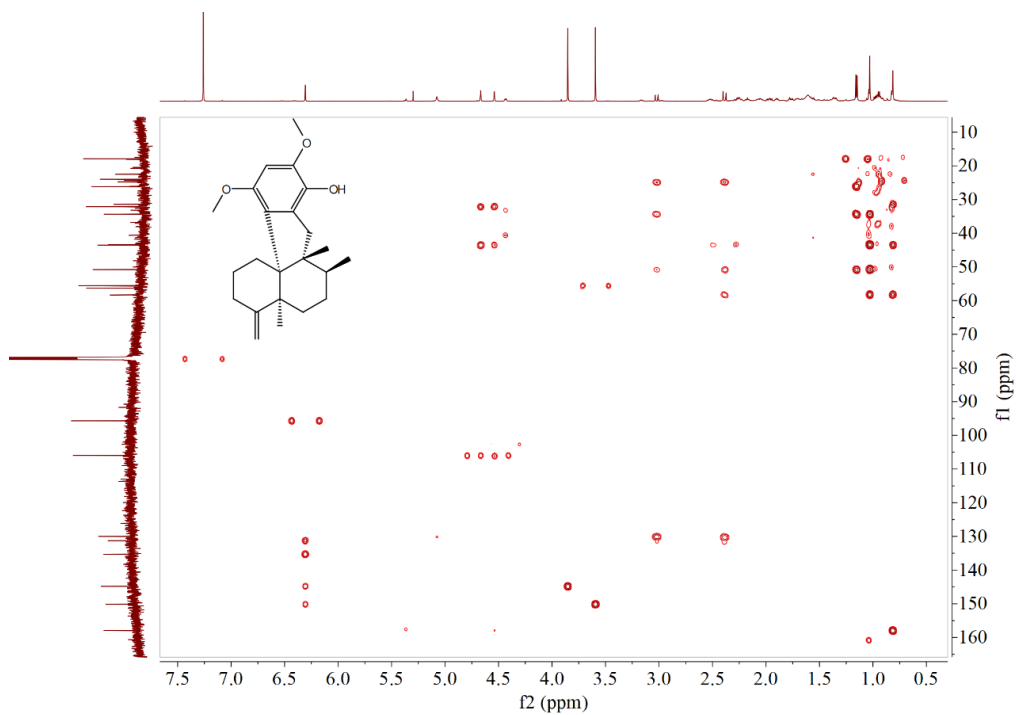

(g) HMBC spectrum of compound 9 in  $\text{CDCl}_3$

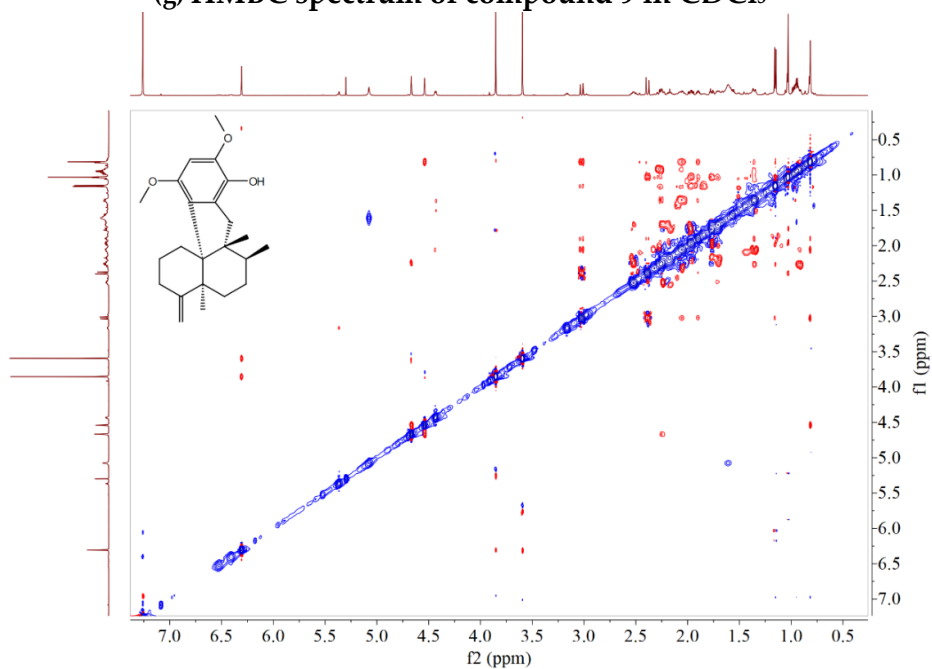

(h) NOESY spectrum of compound 9 in  $\text{CDCl}_3$

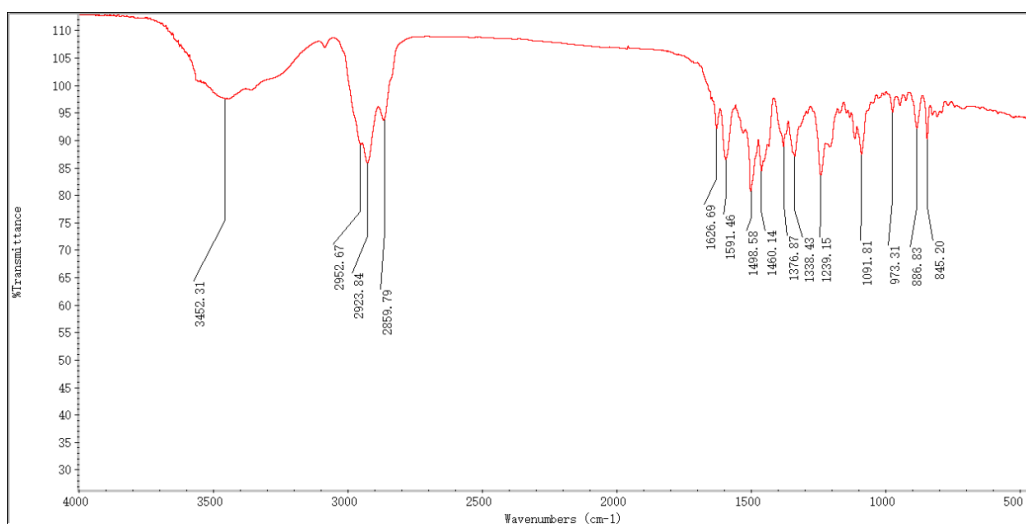

(i) FT-IR spectrum of compound 9

Figure S4 1D, 2D NMR, MS and IR spectra of Compound 9

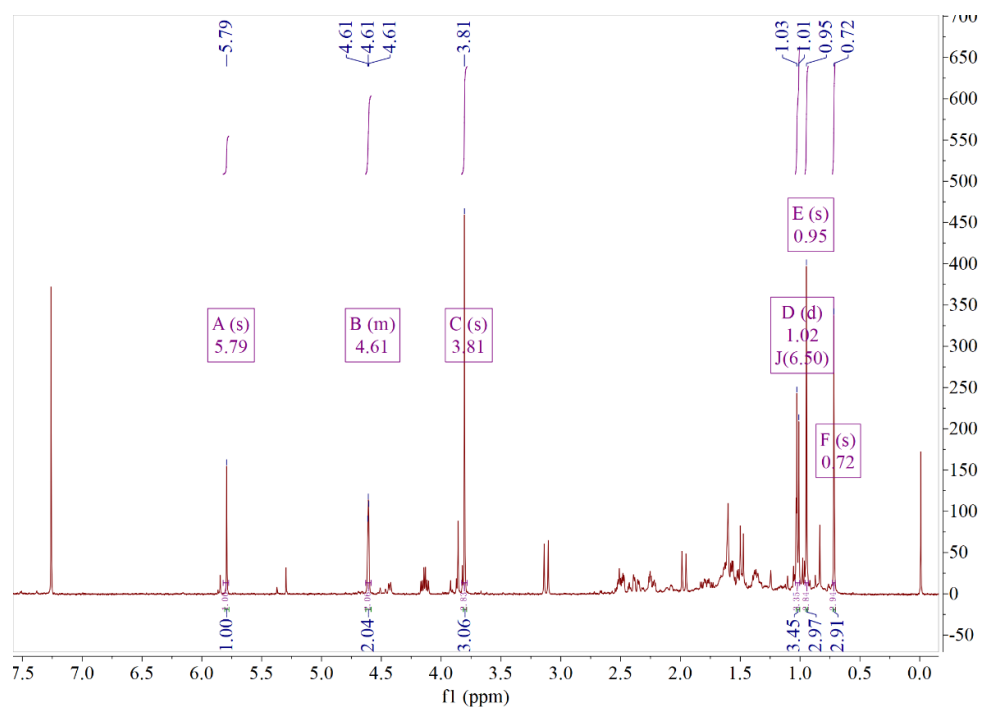

(a) <sup>1</sup>H NMR spectrum of compound 12 in CDCl<sub>3</sub>

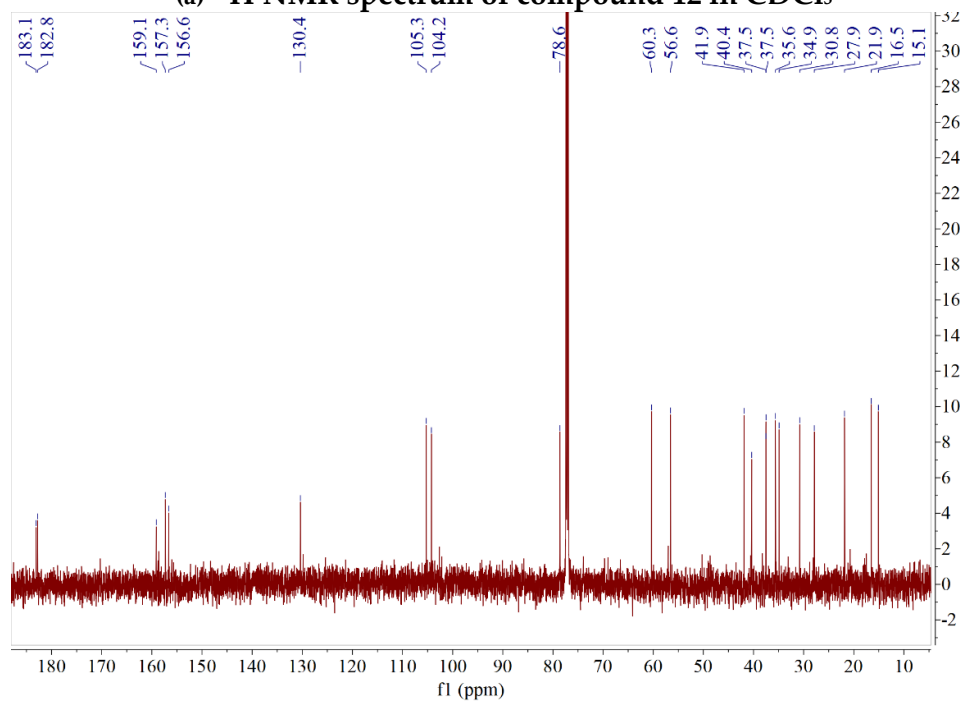

(b) <sup>13</sup>C NMR spectrum of compound 12 in CDCl<sub>3</sub>

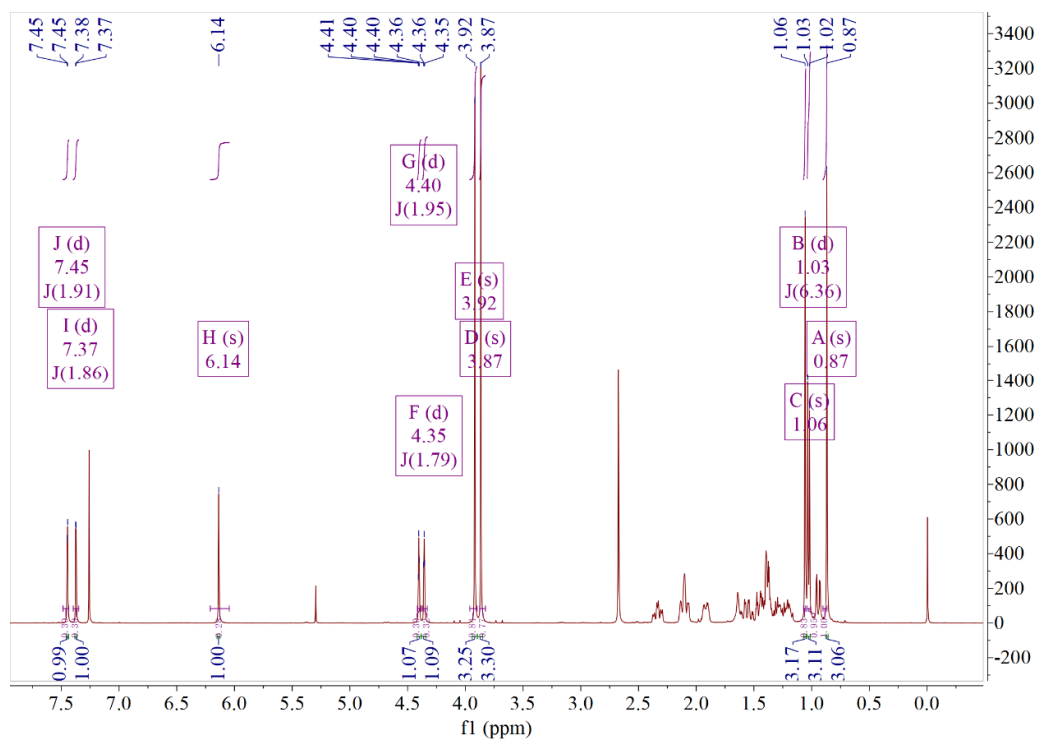

(c) <sup>1</sup>H NMR spectrum of compound 14 in CDCl<sub>3</sub>

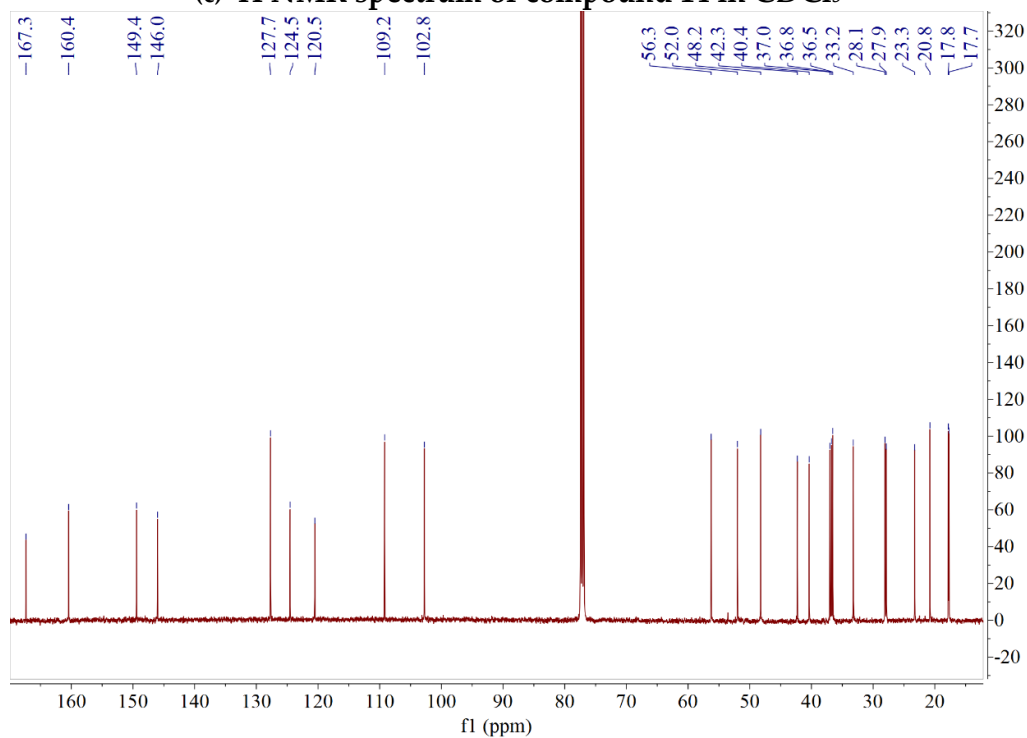

(d) <sup>13</sup>C NMR spectrum of compound 14 in CDCl<sub>3</sub>



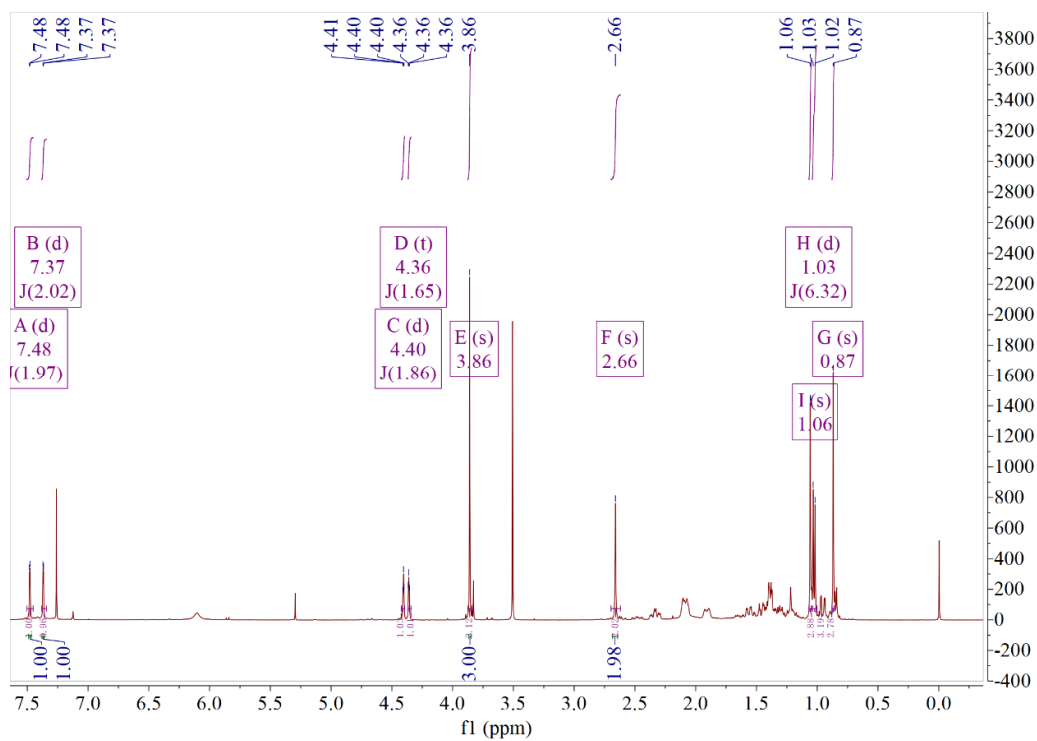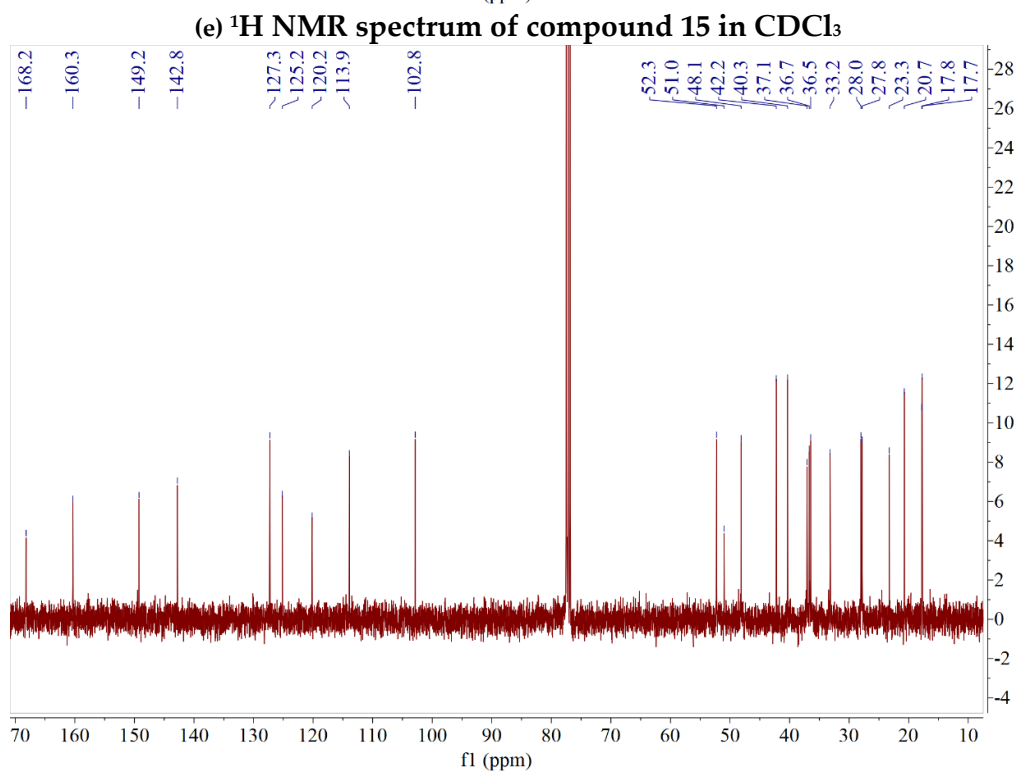

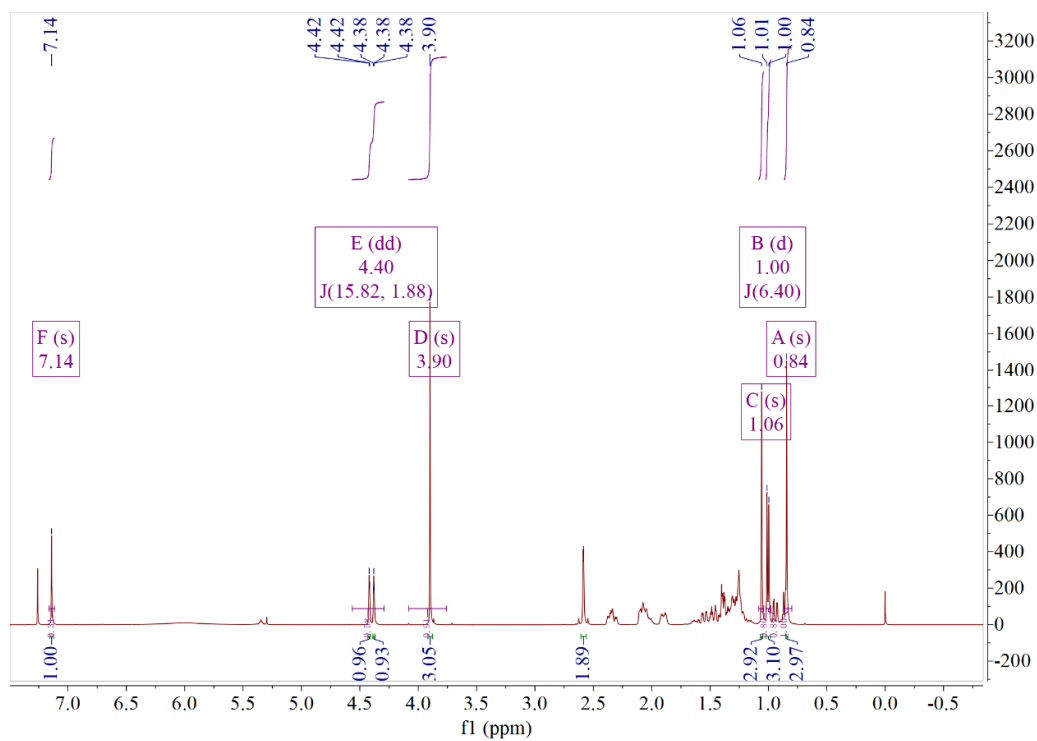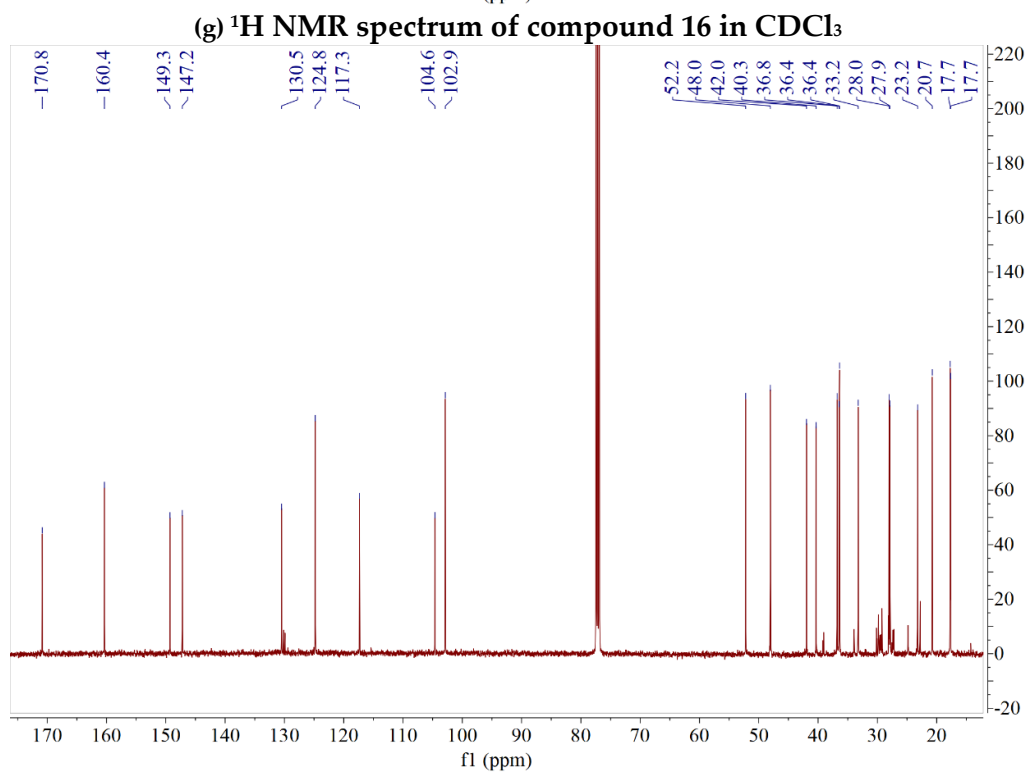

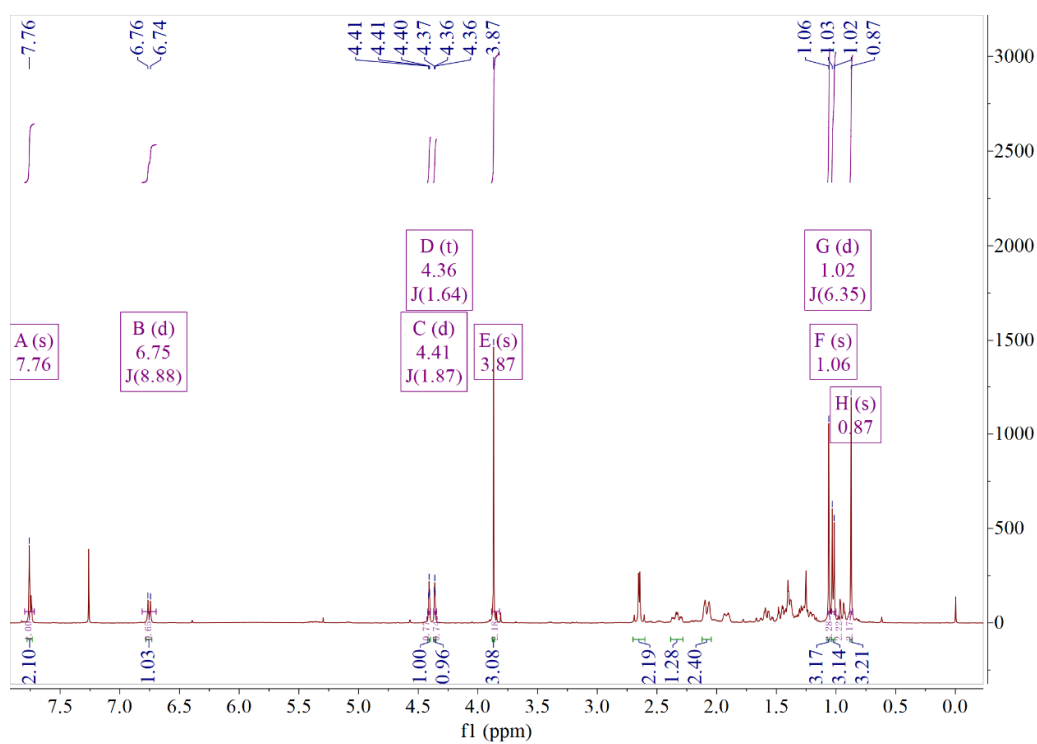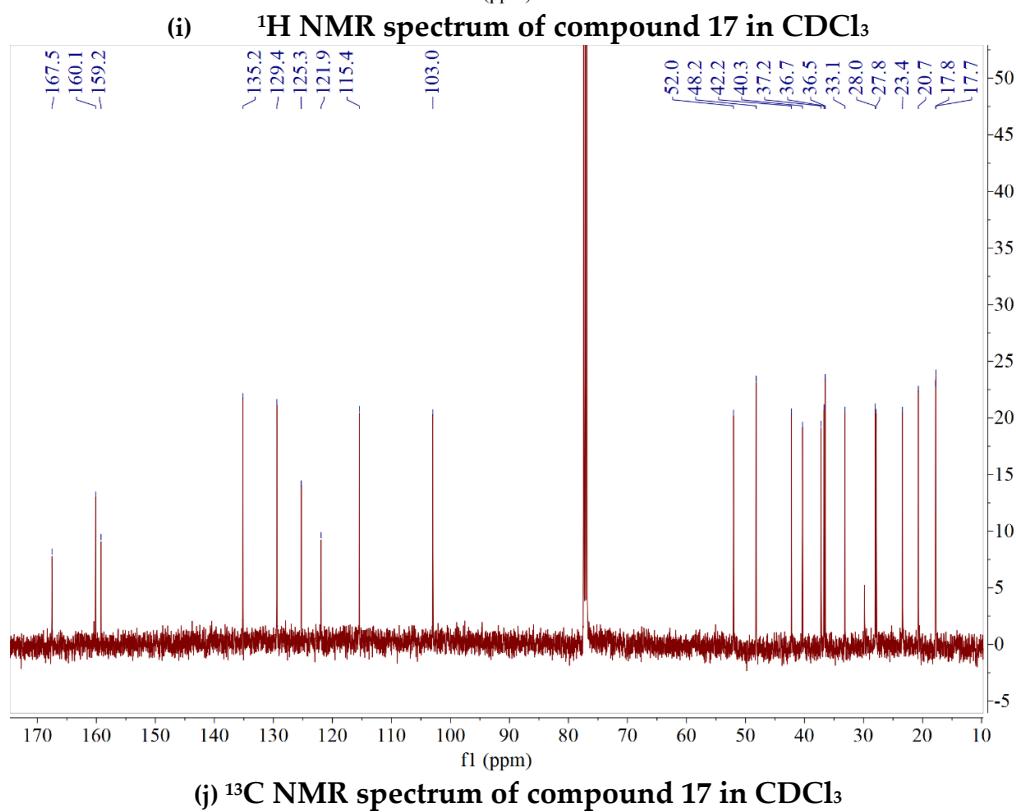

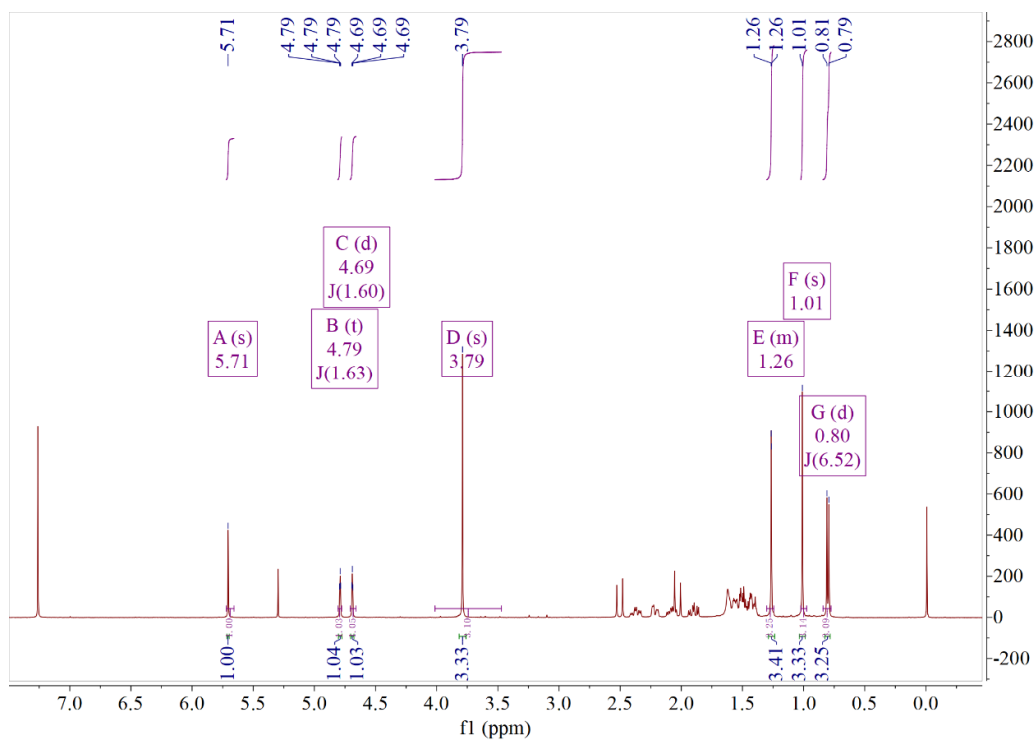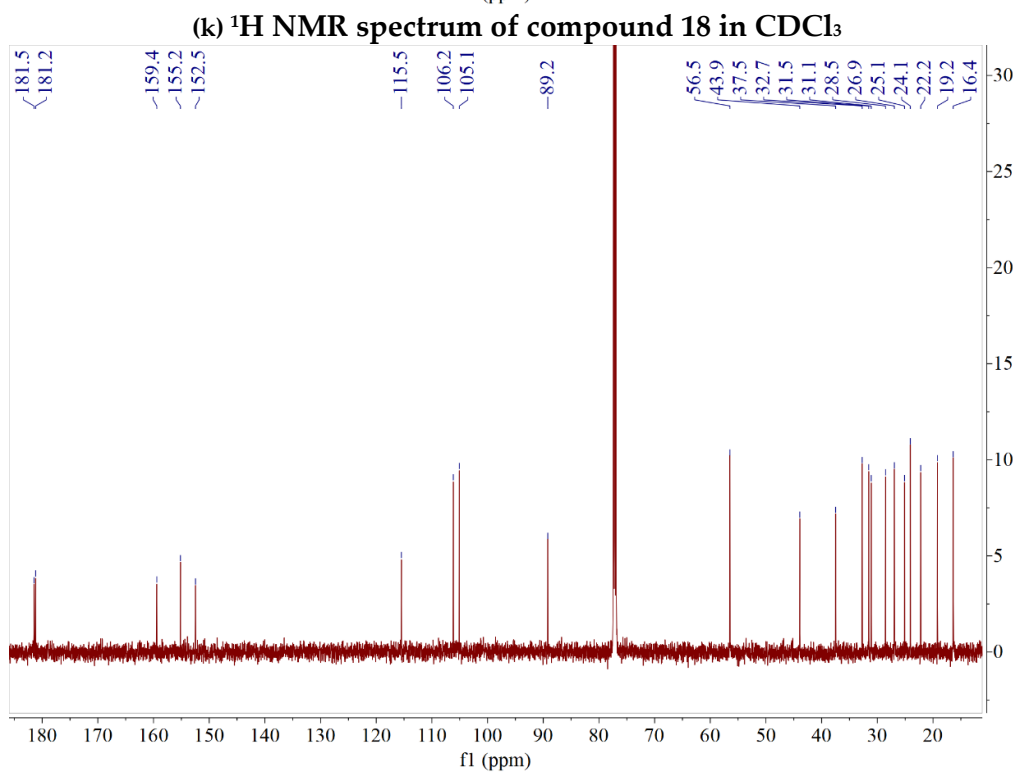

(l) <sup>13</sup>C NMR spectrum of compound 18 in CDCl<sub>3</sub>

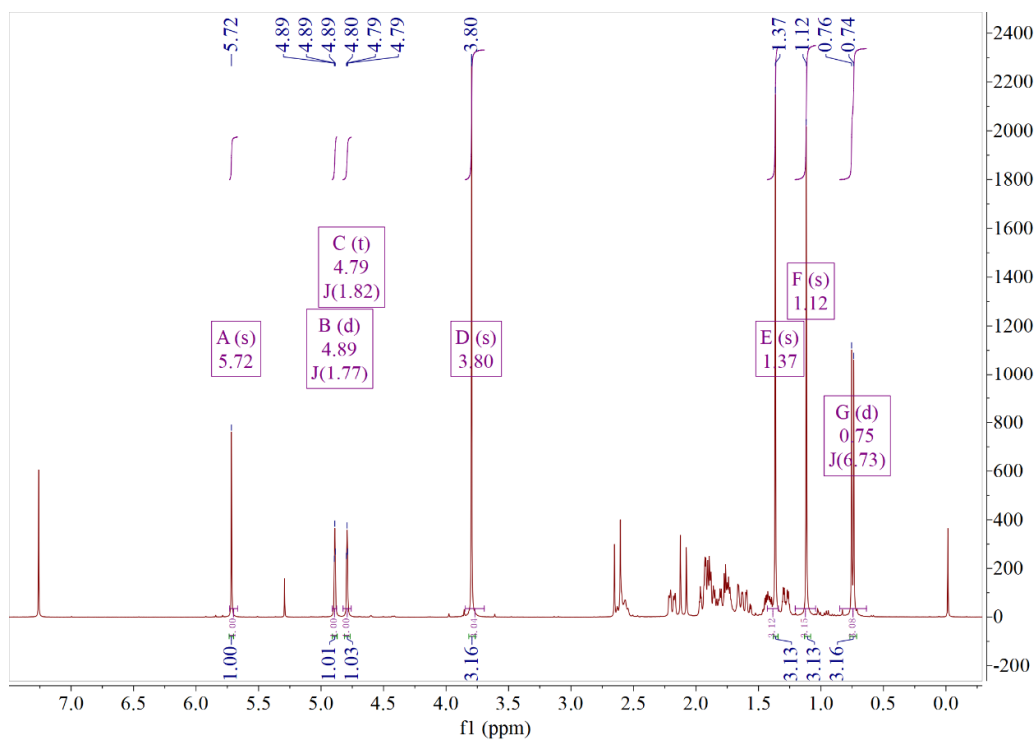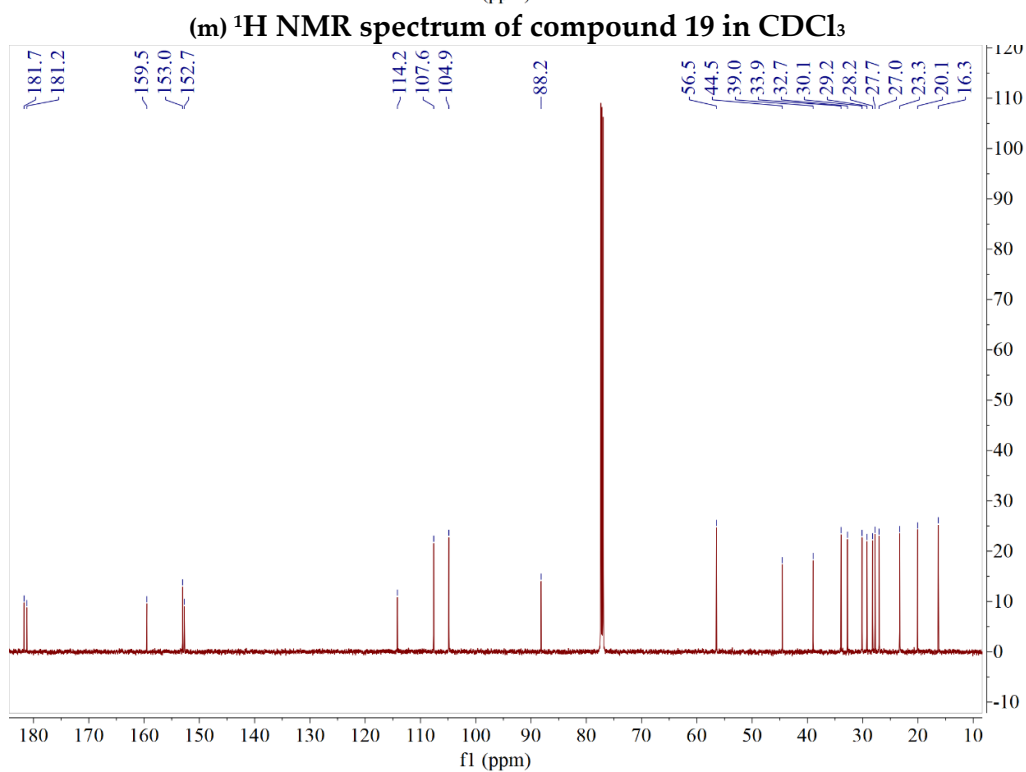

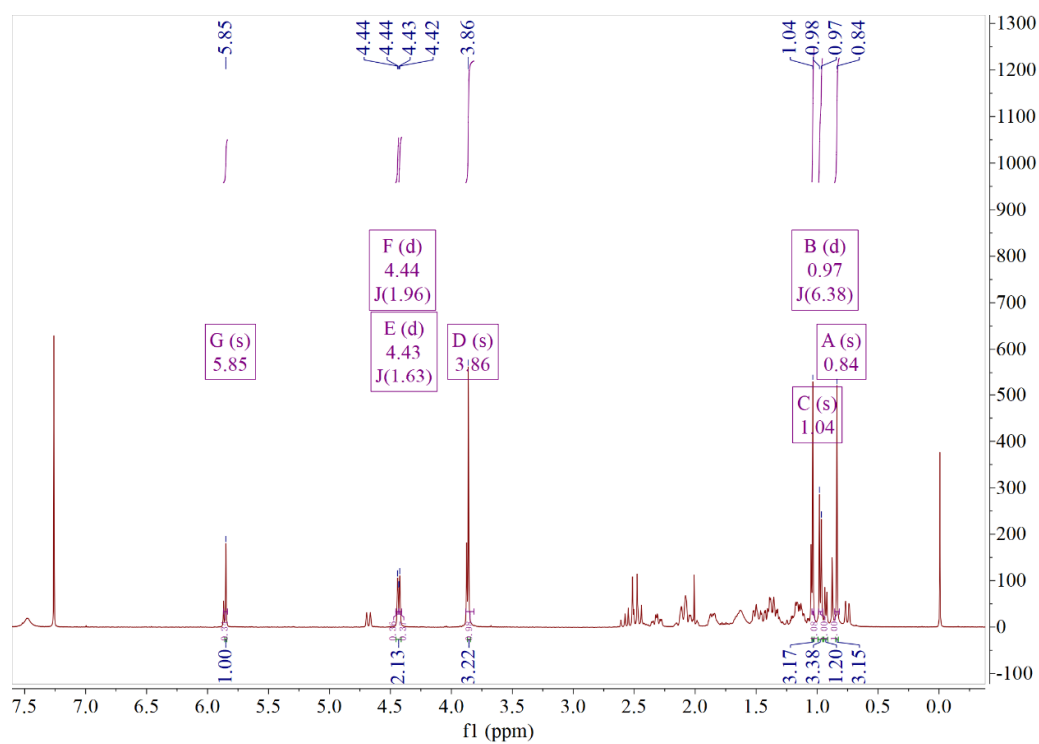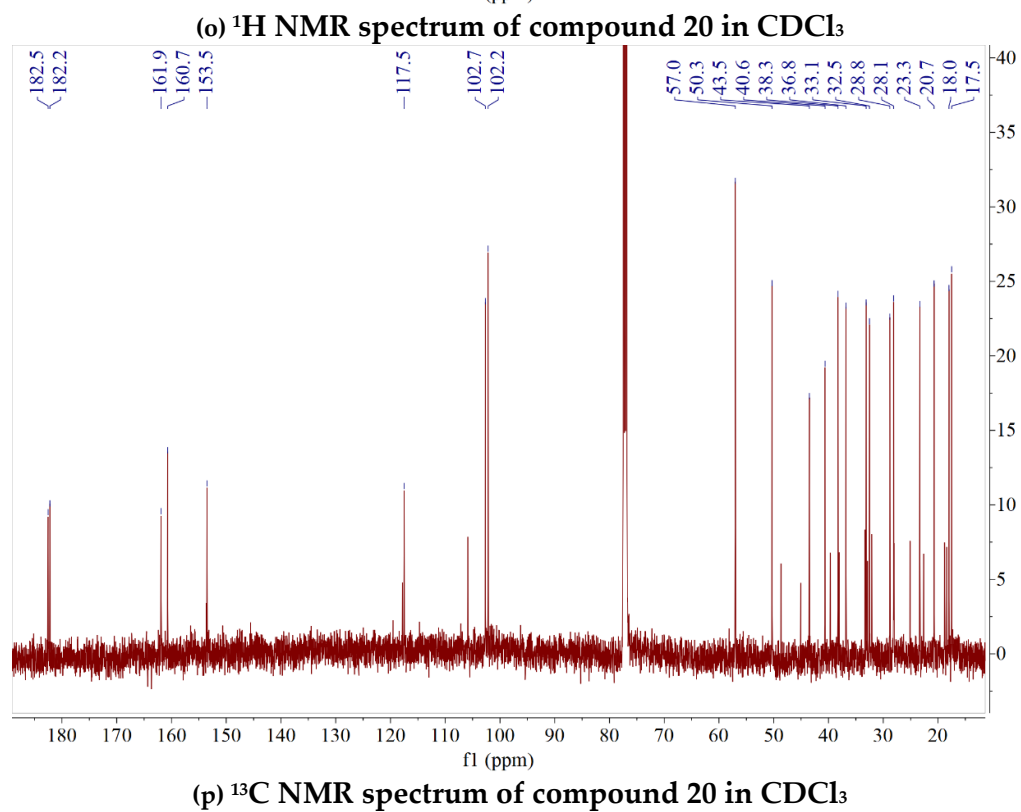

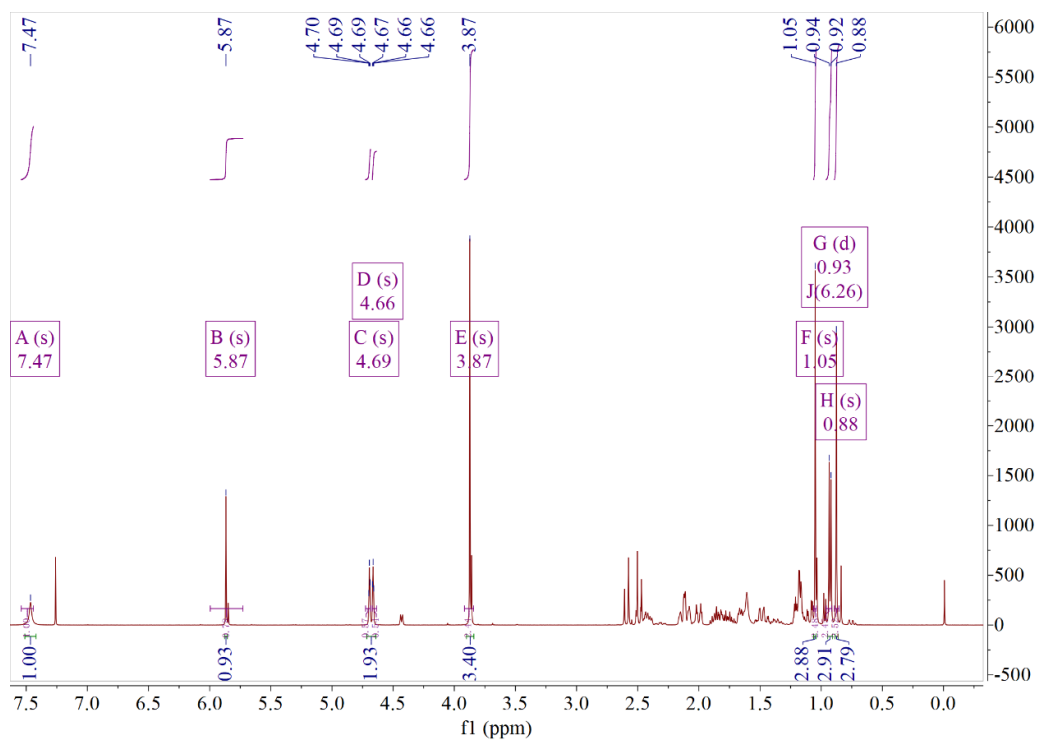

(q) <sup>1</sup>H NMR spectrum of compound 21 in CDCl<sub>3</sub>

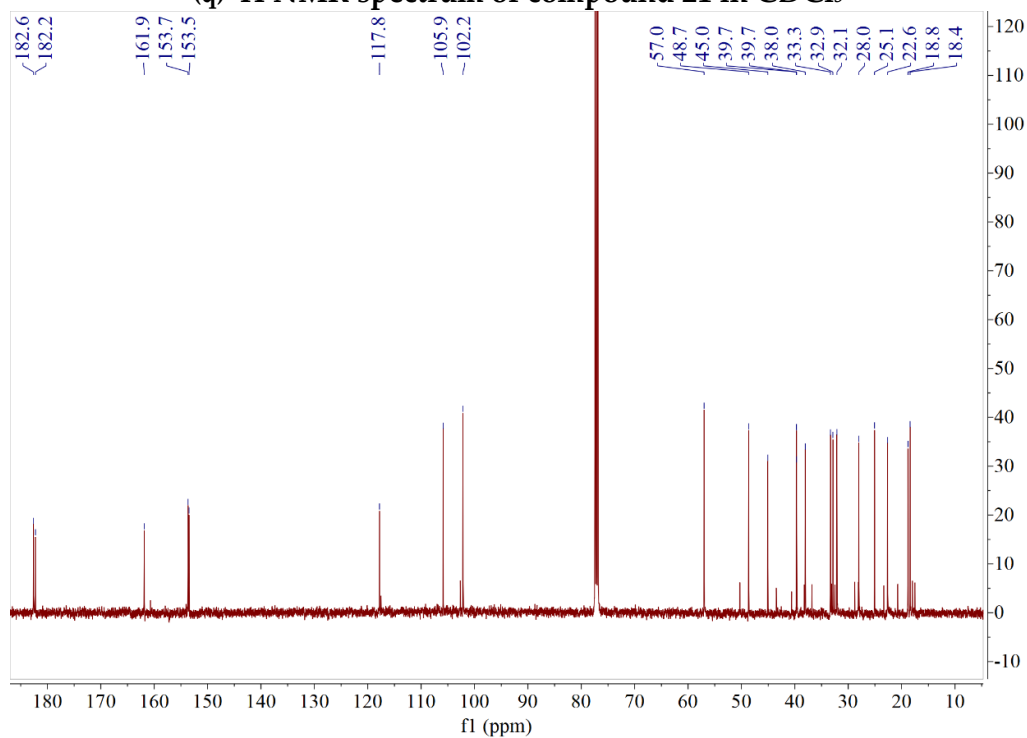

(r) <sup>13</sup>C NMR spectrum of compound 21 in CDCl<sub>3</sub>

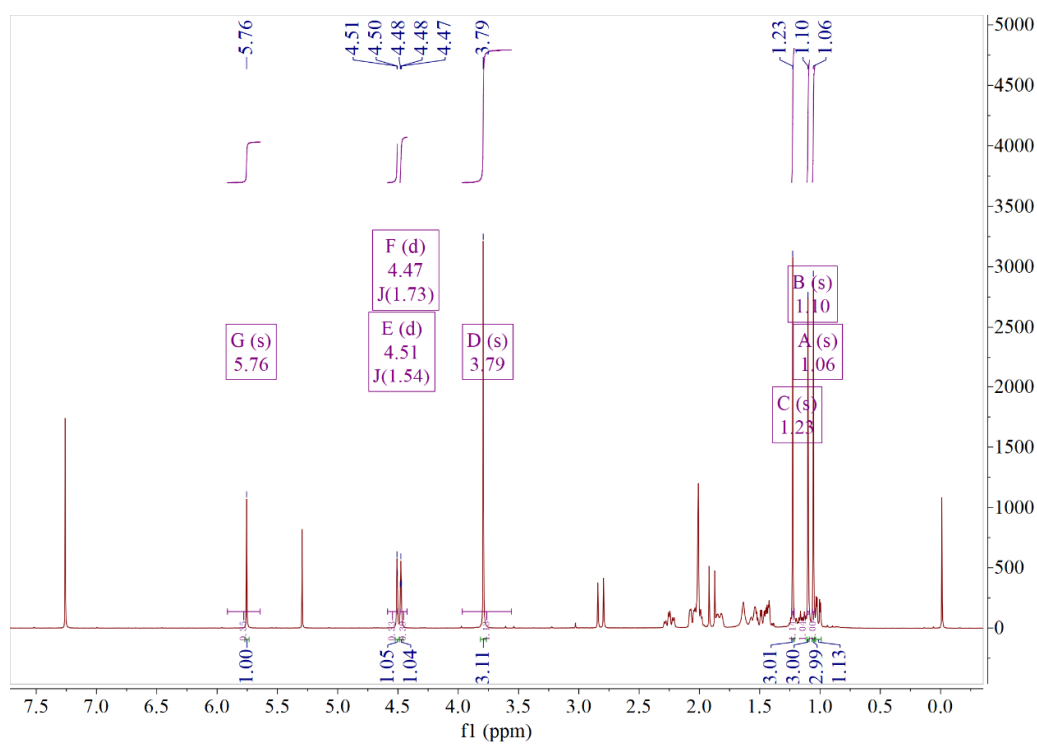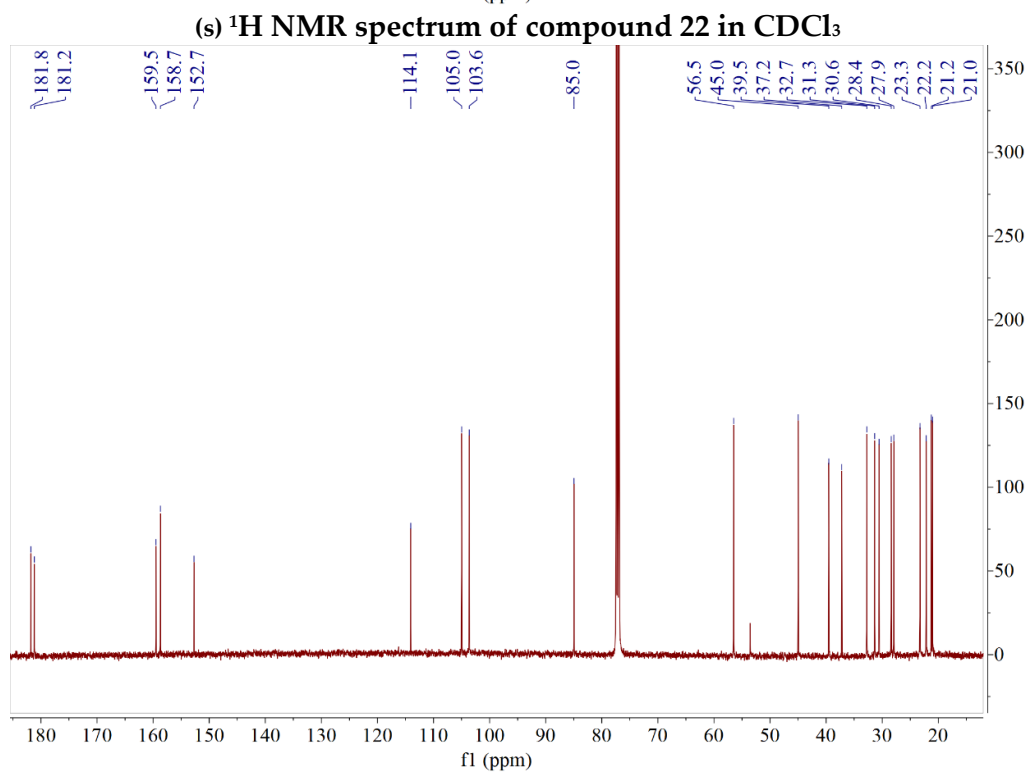



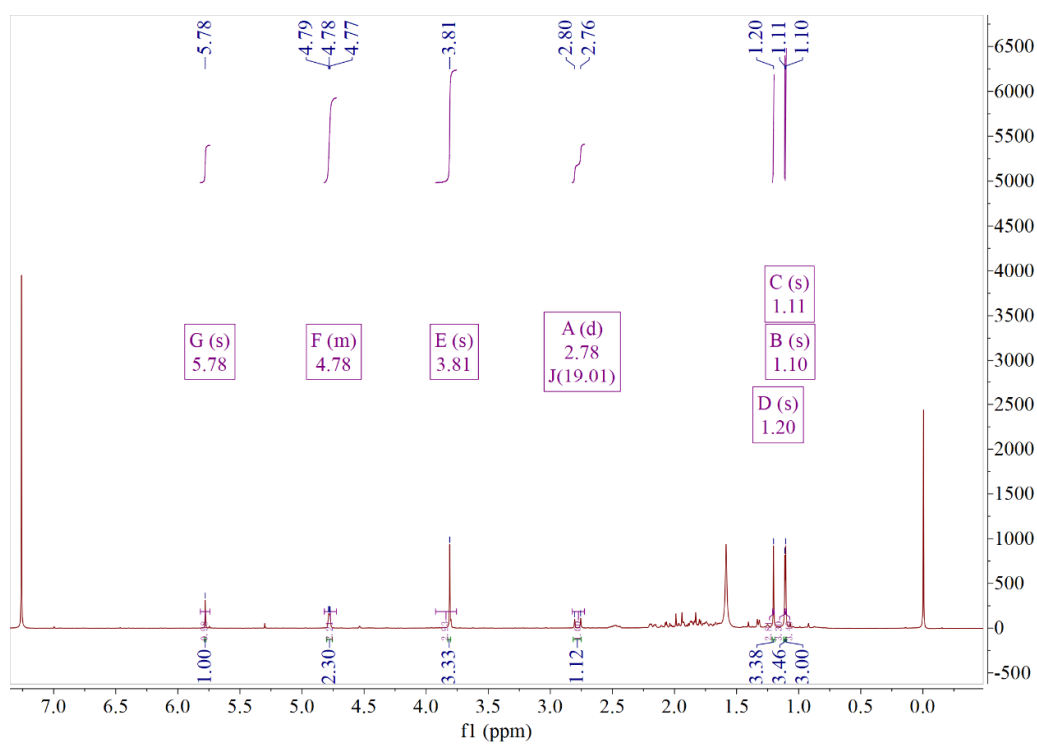

(u) <sup>1</sup>H NMR spectrum of compound 23 in CDCl<sub>3</sub>

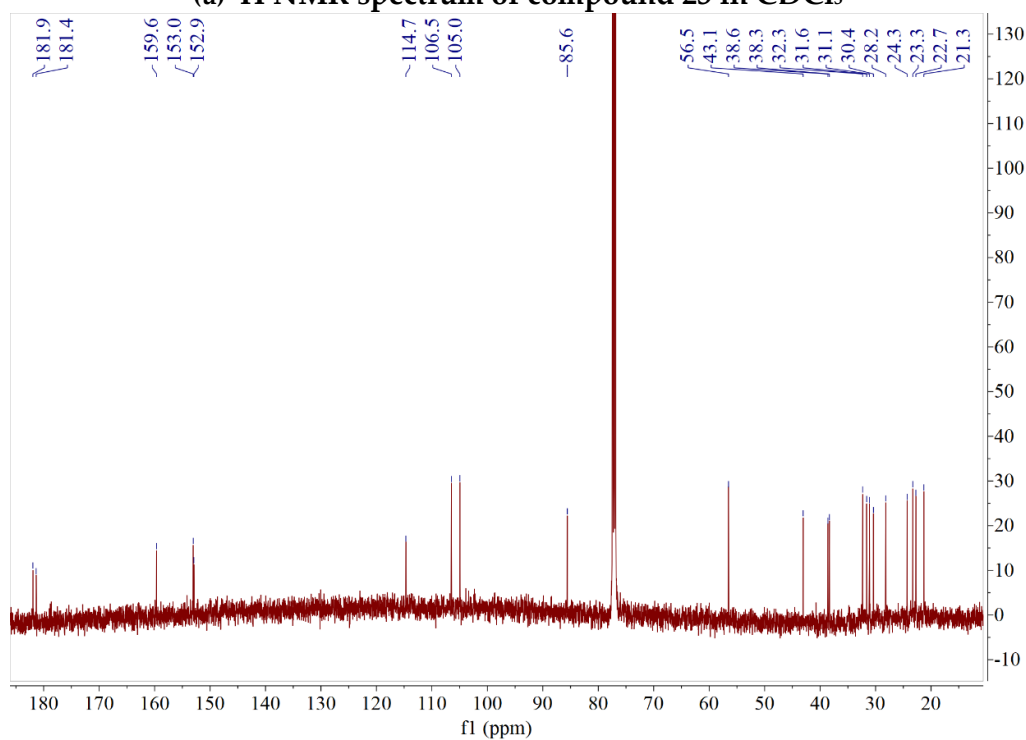

(v) <sup>13</sup>C NMR spectrum of compound 23 in CDCl<sub>3</sub>

Figure S5 <sup>1</sup>H and <sup>13</sup>C NMR spectra of Compound 12 and 14–23
